# Supplementary material for: Dynamic Variation of Amino Acid Contents and Identification of Sterols in Xinyang Mao Jian Green Tea
Source: MDPI journal article supplement (doi:10.3390/molecules27113562), 2022-06-01
Supplement: s1 [file s1]

# Hitachi Amino Acid Analyzer Report

Data File: E:\data\20210701 PF\PF-sm-chaye-yp202129670-sample-7-6ul-2021-7-3 0-21-13.dat  
Method: E:\data\20210701 PF\sm-chaye.met  
Sample ID: {Sample ID}  
Vial Number: 157 Inj. Volume(uL): 6

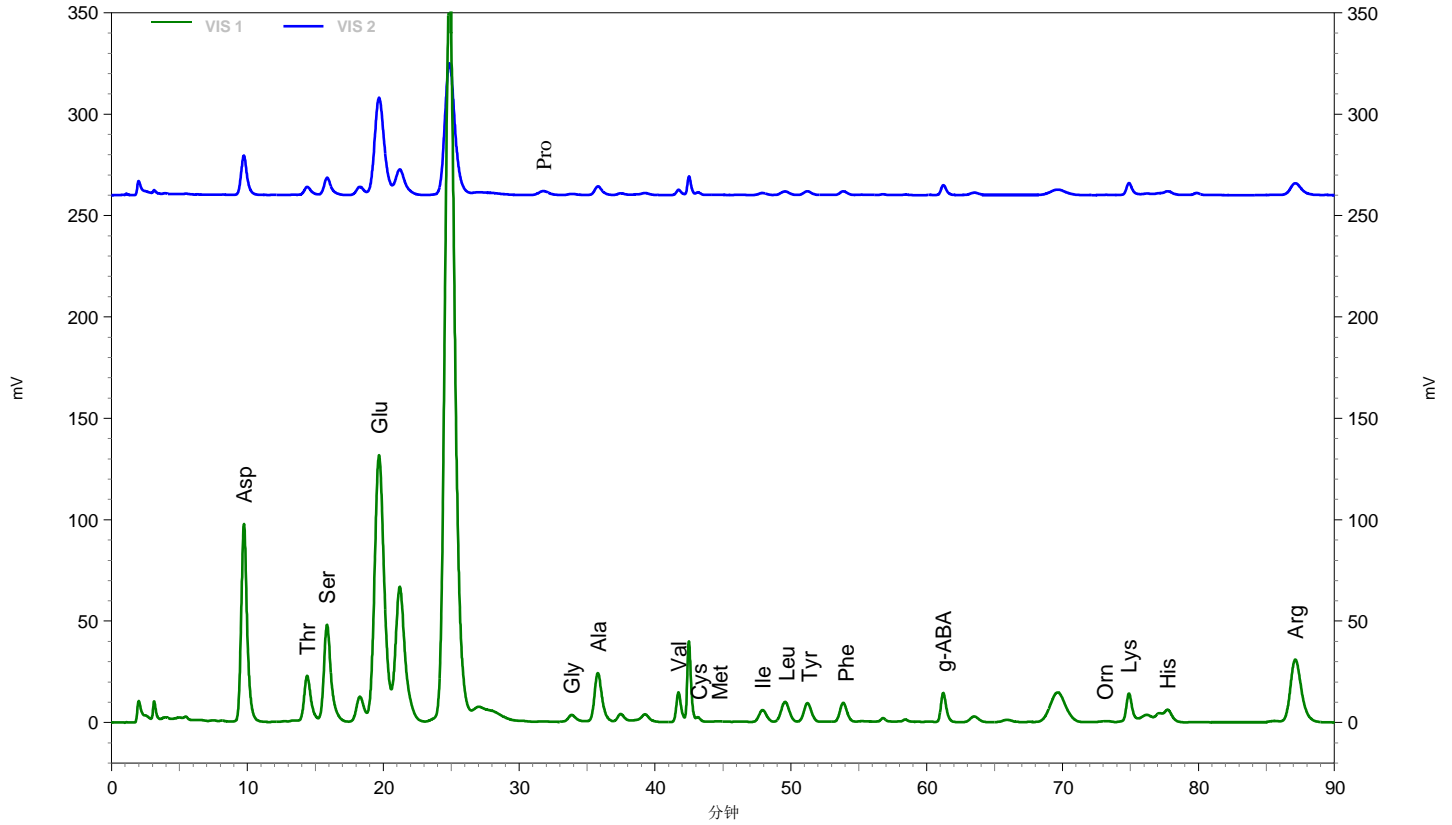

## VIS 1 result

| Peak # | Retention Time | Name  | Area     | Resolution | Mol concentration (nmol/mg) | CalcMol (ng/mg) |
|--------|----------------|-------|----------|------------|-----------------------------|-----------------|
| 10     | 9.747          | Asp   | 11939098 | 1.64       | 13.60                       | 1810.07         |
| 13     | 14.407         | Thr   | 3202398  | 0.84       | 3.49                        | 415.84          |
| 14     | 15.867         | Ser   | 7164672  | 1.58       | 7.77                        | 816.86          |
| 16     | 19.693         | Glu   | 26043071 | 1.17       | 28.92                       | 4254.70         |
| 21     | 33.880         | Gly   | 491291   | 1.97       | 0.52                        | 39.08           |
| 22     | 35.807         | Ala   | 3608270  | 1.92       | 3.76                        | 335.01          |
| 25     | 41.740         | Val   | 1420389  | 2.75       | 1.43                        | 167.09          |
| 27     | 43.160         | Cys   | 186119   | 0.96       | 0.16                        | 39.33           |
| 28     | 44.673         | Met   | 15355    | 1.93       | 0.01                        | 2.23            |
| 30     | 47.927         | Ile   | 910701   | 0.00       | 0.88                        | 116.00          |
| 31     | 49.580         | Leu   | 1653569  | 1.52       | 1.64                        | 214.68          |
| 32     | 51.227         | Tyr   | 1422120  | 1.51       | 1.42                        | 257.16          |
| 33     | 53.867         | Phe   | 1332768  | 2.62       | 1.36                        | 224.08          |
| 39     | 61.227         | g-ABA | 1579970  | 1.48       | 1.64                        | 169.36          |
| 44     | 73.240         | Orn   | 120374   | 1.34       | 0.09                        | 11.25           |
| 45     | 74.893         | Lys   | 1793205  | 1.54       | 1.56                        | 227.37          |
| 48     | 77.733         | His   | 1057782  | 0.00       | 0.97                        | 150.28          |
| 50     | 87.140         | Arg   | 7115823  | 0.96       | 7.11                        | 1238.09         |

|     |  |  |          |  |       |  |
|-----|--|--|----------|--|-------|--|
| Sum |  |  | 71056975 |  | 76.33 |  |
|-----|--|--|----------|--|-------|--|

## VIS 2 result

| Peak # | Retention Time | Name | Area   | Resolution | Mol concentration (nmol/mg) | CalcMol (ng/mg) |
|--------|----------------|------|--------|------------|-----------------------------|-----------------|
| 8      | 31.813         | Pro  | 372603 | 5.19       | 1.36                        | 156.03          |

|     |  |  |        |  |      |  |
|-----|--|--|--------|--|------|--|
| Sum |  |  | 372603 |  | 1.36 |  |
|-----|--|--|--------|--|------|--|
