# Supplementary material for: Dynamic Variation of Amino Acid Contents and Identification of Sterols in Xinyang Mao Jian Green Tea
Source: MDPI journal article supplement (doi:10.3390/molecules27113562), 2022-06-01
Supplement: s1 [file s1]

# Hitachi Amino Acid Analyzer Report

Data File: E:\data\20210701 PF\PF-sm-chaye-yp202129670-sample-10-6ul-2021-7-3 5-58-11.dat  
Method: E:\data\20210701 PF\sm-asn.met  
Sample ID: {Sample ID}  
Vial Number: 160 Inj. Volume(uL): 6

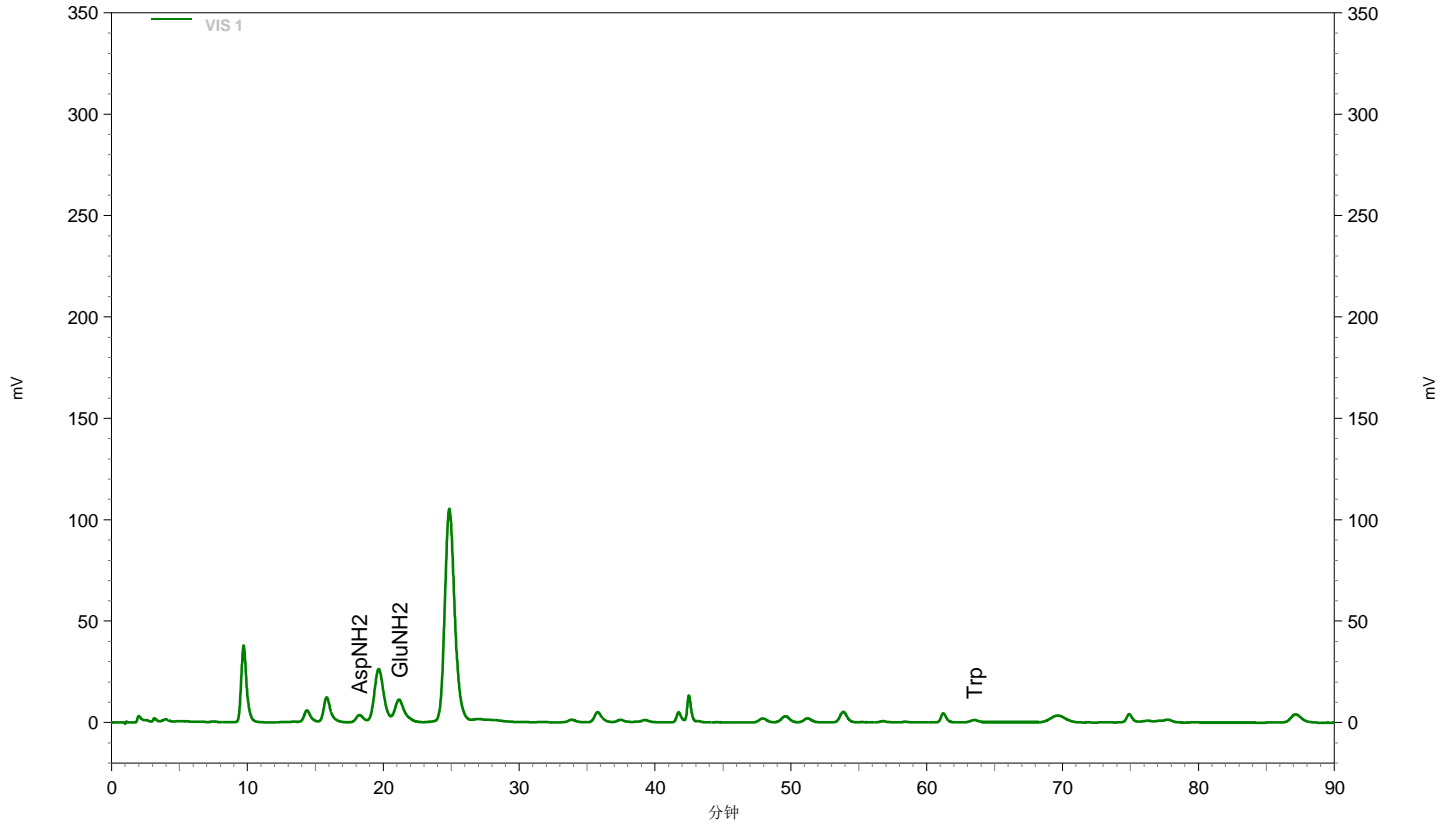

## VIS 1 result

| Peak # | Retention Time | Name   | Area    | Resolution | Mol concentration (nmol/mg) | CalcMol (ng/mg) |
|--------|----------------|--------|---------|------------|-----------------------------|-----------------|
| 15     | 18.253         | AspNH2 | 538534  | 2.51       | 0.75                        | 99.46           |
| 17     | 21.167         | GluNH2 | 2260069 | 1.16       | 2.76                        | 403.73          |
| 35     | 63.513         | Trp    | 192480  | 2.39       | 0.30                        | 61.49           |
| SUM    |                |        | 2991083 |            | 3.82                        |                 |

## VIS 2 result

| Peak # | Retention Time | Name | Area | Resolution | Mol concentration (nmol/mg) | CalcMol (ng/mg) |
|--------|----------------|------|------|------------|-----------------------------|-----------------|
|--------|----------------|------|------|------------|-----------------------------|-----------------|
