# Supplementary material for: Dynamic Variation of Amino Acid Contents and Identification of Sterols in Xinyang Mao Jian Green Tea
Source: MDPI journal article supplement (doi:10.3390/molecules27113562), 2022-06-01
Supplement: s1 [file s1]

# Hitachi Amino Acid Analyzer Report

Data File: E:\data\20210701 PF\PF-sm-chaye-yp202129670-sample-10-6ul-2021-7-3 5-58-11.dat  
Method: E:\data\20210701 PF\sm-chaye.met  
Sample ID: {Sample ID}  
Vial Number: 160 Inj. Volume(uL): 6

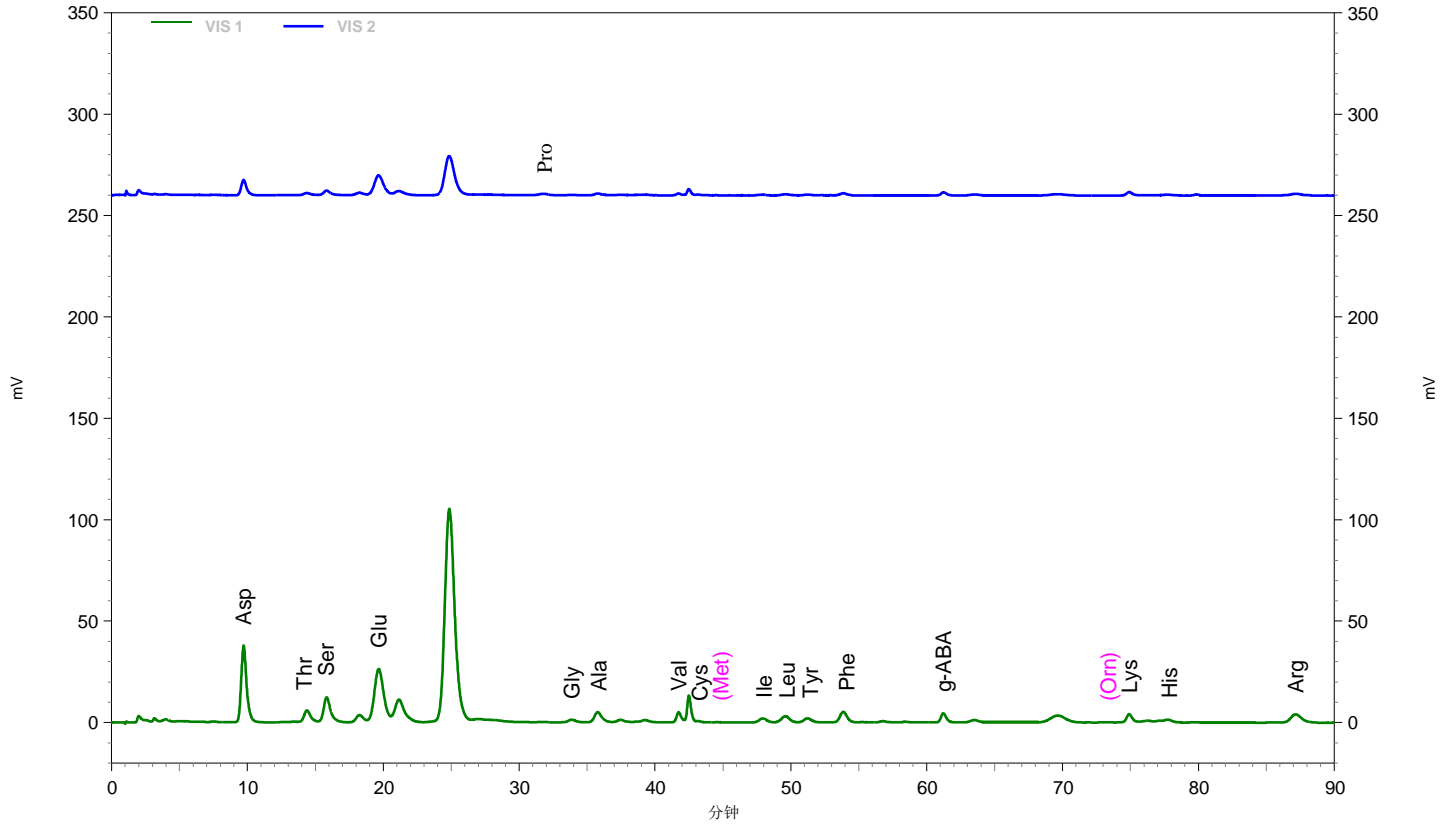

## VIS 1 result

| Peak # | Retention Time | Name  | Area    | Resolution | Mol concentration (nmol/mg) | CalcMol (ng/mg) |
|--------|----------------|-------|---------|------------|-----------------------------|-----------------|
| 11     | 9.720          | Asp   | 4208832 | 2.53       | 4.79                        | 637.78          |
| 13     | 14.380         | Thr   | 748685  | 2.50       | 0.82                        | 97.17           |
| 14     | 15.833         | Ser   | 1747096 | 1.65       | 1.89                        | 199.09          |
| 16     | 19.660         | Glu   | 5105589 | 1.21       | 5.67                        | 833.69          |
| 20     | 33.867         | Gly   | 199425  | 2.90       | 0.21                        | 15.85           |
| 21     | 35.800         | Ala   | 736064  | 1.93       | 0.77                        | 68.31           |
| 24     | 41.740         | Val   | 482808  | 3.06       | 0.48                        | 56.77           |
| 26     | 43.160         | Cys   | 52567   | 0.96       | 0.05                        | 11.10           |
|        |                | Met   |         |            | 0.00 BDL                    | 0.00            |
| 27     | 47.927         | Ile   | 301044  | 5.01       | 0.29                        | 38.33           |
| 28     | 49.607         | Leu   | 495445  | 1.56       | 0.49                        | 64.29           |
| 29     | 51.247         | Tyr   | 296011  | 1.52       | 0.30                        | 53.50           |
| 30     | 53.873         | Phe   | 734246  | 2.62       | 0.75                        | 123.39          |
| 34     | 61.233         | g-ABA | 491672  | 4.17       | 0.51                        | 52.68           |
|        |                | Orn   |         |            | 0.00 BDL                    | 0.00            |
| 38     | 74.907         | Lys   | 500278  | 3.67       | 0.43                        | 63.40           |
| 41     | 77.747         | His   | 261679  | 0.00       | 0.24                        | 37.16           |
| 42     | 87.167         | Arg   | 893428  | 6.78       | 0.89                        | 155.37          |

|     |  |  |          |  |       |  |
|-----|--|--|----------|--|-------|--|
| SUM |  |  | 17254869 |  | 18.58 |  |
|-----|--|--|----------|--|-------|--|

## VIS 2 result

| Peak # | Retention Time | Name | Area  | Resolution | Mol concentration (nmol/mg) | CalcMol (ng/mg) |
|--------|----------------|------|-------|------------|-----------------------------|-----------------|
| 8      | 31.840         | Pro  | 86875 | 5.79       | 0.32                        | 36.36           |

|     |  |  |       |  |      |  |
|-----|--|--|-------|--|------|--|
| SUM |  |  | 86875 |  | 0.32 |  |
|-----|--|--|-------|--|------|--|
