# Supplementary material for: Dynamic Variation of Amino Acid Contents and Identification of Sterols in Xinyang Mao Jian Green Tea
Source: MDPI journal article supplement (doi:10.3390/molecules27113562), 2022-06-01
Supplement: s1 [file s1]

# Hitachi Amino Acid Analyzer Report

Data File: E:\data\20210701 PF\PF-sm-chaye-yp202129670-sample-6-6ul-2021-7-2 16-52-14.dat  
Method: E:\data\20210701 PF\sm-asn.met  
Sample ID: {Sample ID}  
Vial Number: 156 Inj. Volume(uL): 6

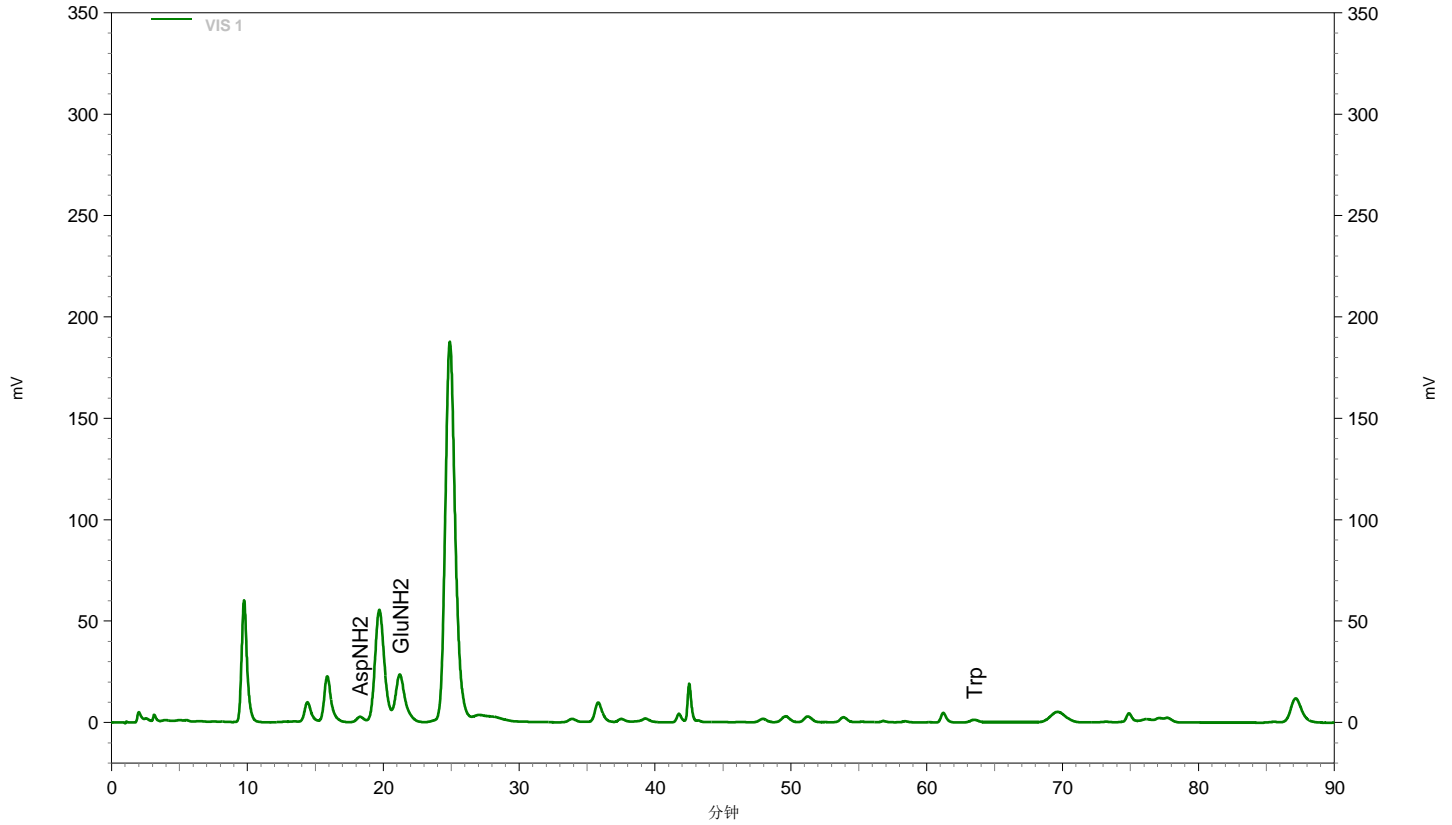

## VIS 1 result

| Peak # | Retention Time | Name   | Area    | Resolution | Mol concentration (nmol/mg) | CalcMol (ng/mg) |
|--------|----------------|--------|---------|------------|-----------------------------|-----------------|
| 15     | 18.293         | AspNH2 | 388355  | 2.48       | 0.54                        | 71.72           |
| 17     | 21.227         | GluNH2 | 4666063 | 1.18       | 5.71                        | 833.52          |
| 37     | 63.507         | Trp    | 225234  | 2.39       | 0.35                        | 71.96           |
| Sum    |                |        | 5279652 |            | 6.60                        |                 |

## VIS 2 result

| Peak # | Retention Time | Name | Area | Resolution | Mol concentration (nmol/mg) | CalcMol (ng/mg) |
|--------|----------------|------|------|------------|-----------------------------|-----------------|
|--------|----------------|------|------|------------|-----------------------------|-----------------|
