# Supplementary material for: Dynamic Variation of Amino Acid Contents and Identification of Sterols in Xinyang Mao Jian Green Tea
Source: MDPI journal article supplement (doi:10.3390/molecules27113562), 2022-06-01
Supplement: s1 [file s1]

# Hitachi Amino Acid Analyzer Report

Data File: E:\data\20210701 PF\PF-sm-chaye-yp202129670-sample-9-6ul-2021-7-3 4-05-57.dat  
Method: E:\data\20210701 PF\sm-chaye.met  
Sample ID: {Sample ID}  
Vial Number: 159 Inj. Volume(uL): 6

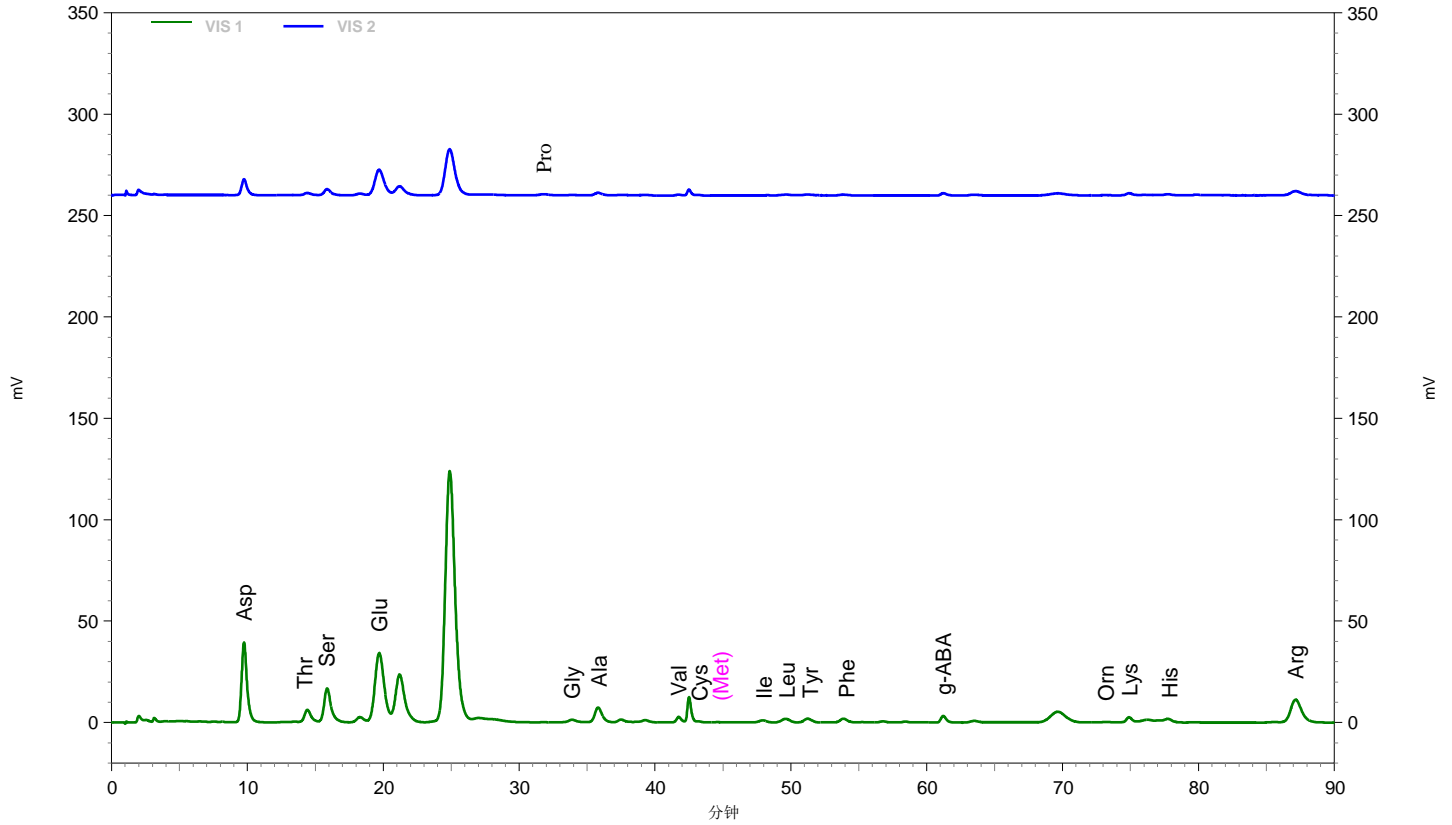

## VIS 1 result

| Peak # | Retention Time | Name  | Area    | Resolution | Mol concentration (nmol/mg) | CalcMol (ng/mg) |
|--------|----------------|-------|---------|------------|-----------------------------|-----------------|
| 11     | 9.747          | Asp   | 4379922 | 2.54       | 4.99                        | 663.70          |
| 12     | 14.413         | Thr   | 781788  | 5.94       | 0.85                        | 101.47          |
| 13     | 15.867         | Ser   | 2373594 | 1.66       | 2.57                        | 270.48          |
| 15     | 19.700         | Glu   | 6571597 | 1.23       | 7.29                        | 1073.08         |
| 19     | 33.893         | Gly   | 176618  | 2.85       | 0.19                        | 14.04           |
| 20     | 35.813         | Ala   | 1057077 | 1.95       | 1.10                        | 98.09           |
| 23     | 41.747         | Val   | 261764  | 2.79       | 0.26                        | 30.78           |
| 25     | 43.147         | Cys   | 43641   | 0.81       | 0.04                        | 9.22            |
|        |                | Met   |         |            | 0.00 BDL                    | 0.00            |
| 26     | 47.927         | Ile   | 148308  | 4.54       | 0.14                        | 18.88           |
| 27     | 49.633         | Leu   | 299315  | 1.60       | 0.30                        | 38.84           |
| 28     | 51.247         | Tyr   | 286250  | 1.49       | 0.29                        | 51.74           |
| 29     | 53.880         | Phe   | 249562  | 2.61       | 0.25                        | 41.94           |
| 32     | 61.233         | g-ABA | 358975  | 4.17       | 0.37                        | 38.46           |
| 36     | 73.207         | Orn   | 22801   | 2.29       | 0.02                        | 2.13            |
| 37     | 74.900         | Lys   | 329724  | 1.91       | 0.29                        | 41.79           |
| 40     | 77.747         | His   | 298820  | 0.00       | 0.27                        | 42.43           |
| 41     | 87.160         | Arg   | 2502199 | 6.82       | 2.50                        | 435.14          |

|     |  |  |          |  |       |  |
|-----|--|--|----------|--|-------|--|
| Sum |  |  | 20141955 |  | 21.72 |  |
|-----|--|--|----------|--|-------|--|

## VIS 2 result

| Peak # | Retention Time | Name | Area  | Resolution | Mol concentration (nmol/mg) | CalcMol (ng/mg) |
|--------|----------------|------|-------|------------|-----------------------------|-----------------|
| 8      | 31.807         | Pro  | 82147 | 5.65       | 0.30                        | 34.38           |

|     |  |  |       |  |      |  |
|-----|--|--|-------|--|------|--|
| Sum |  |  | 82147 |  | 0.30 |  |
|-----|--|--|-------|--|------|--|
