# Supplementary material for: Dynamic Variation of Amino Acid Contents and Identification of Sterols in Xinyang Mao Jian Green Tea
Source: MDPI journal article supplement (doi:10.3390/molecules27113562), 2022-06-01
Supplement: s1 [file s1]

# Hitachi Amino Acid Analyzer Report

Data File: E:\data\20210701 PF\PF-sm-chaye-yp202129670-sample-5-6ul-2021-7-2 14-59-59.dat  
Method: E:\data\20210701 PF\sm-asn.met  
Sample ID: {Sample ID}  
Vial Number: 155 Inj. Volume(uL): 6

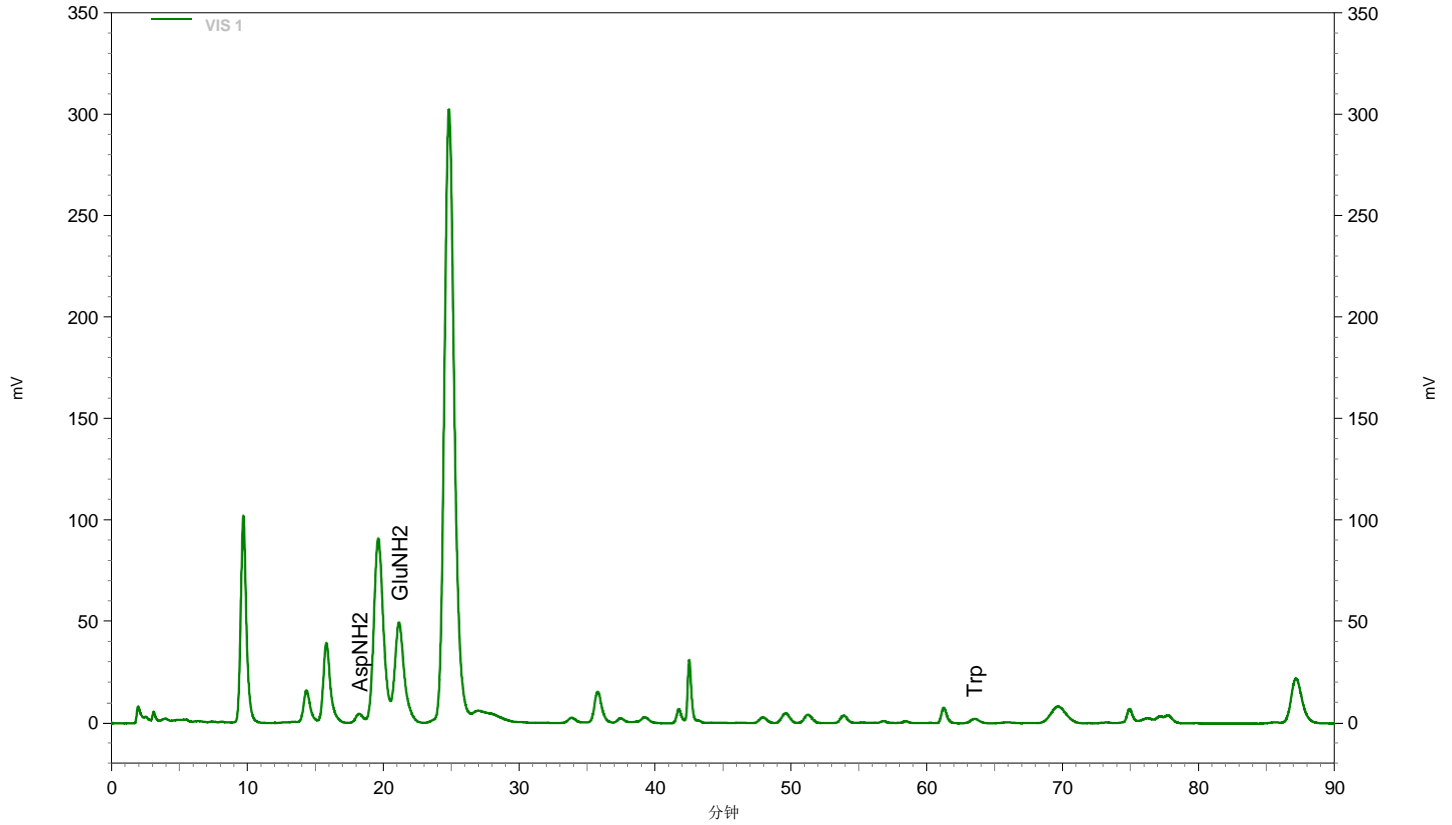

## VIS 1 result

| Peak # | Retention Time | Name   | Area     | Resolution | Mol concentration (nmol/mg) | CalcMol (ng/mg) |
|--------|----------------|--------|----------|------------|-----------------------------|-----------------|
| 16     | 18.247         | AspNH2 | 671349   | 2.45       | 0.94                        | 124.30          |
| 18     | 21.180         | GluNH2 | 9718555  | 1.19       | 11.91                       | 1740.42         |
| 40     | 63.507         | Trp    | 383183   | 2.39       | 0.60                        | 122.72          |
| Sum    |                |        | 10773087 |            | 13.45                       |                 |

## VIS 2 result

| Peak # | Retention Time | Name | Area | Resolution | Mol concentration (nmol/mg) | CalcMol (ng/mg) |
|--------|----------------|------|------|------------|-----------------------------|-----------------|
|--------|----------------|------|------|------------|-----------------------------|-----------------|
