# Supplementary material for: Dynamic Variation of Amino Acid Contents and Identification of Sterols in Xinyang Mao Jian Green Tea
Source: MDPI journal article supplement (doi:10.3390/molecules27113562), 2022-06-01
Supplement: s1 [file s1]

# Hitachi Amino Acid Analyzer Report

Data File: E:\data\20210701 PF\PF-sm-chaye-yp202129670-sample-6-6ul-2021-7-2 16-52-14.dat

Method: E:\data\20210701 PF\sm-chaye.met

Sample ID: {Sample ID}

Vial Number: 156

Inj. Volume(uL): 6

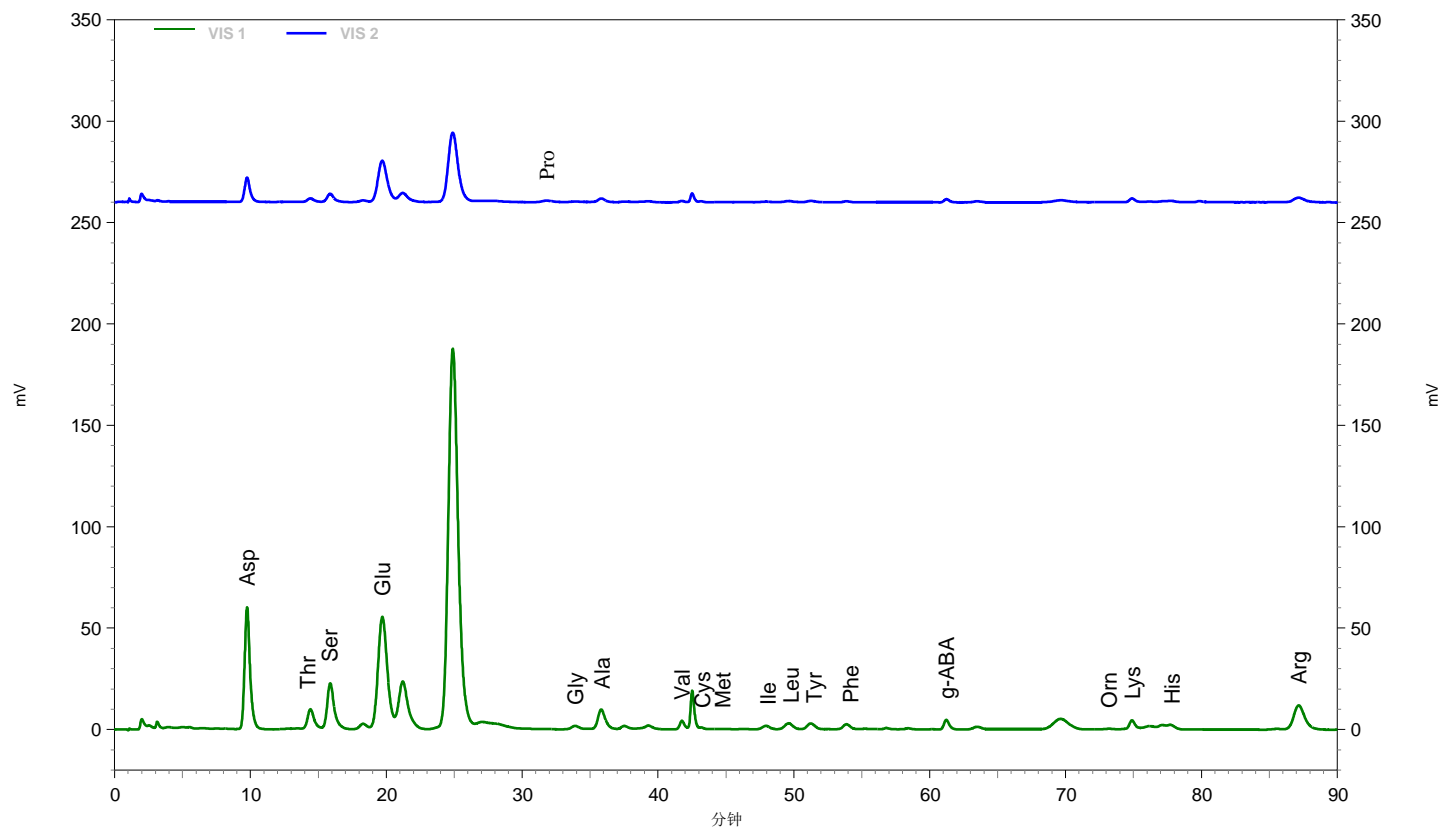

## VIS 1 result

| Peak # | Retention Time | Name  | Area     | Resolution | Mol concentration (nmol/mg) | CalcMol (ng/mg) |
|--------|----------------|-------|----------|------------|-----------------------------|-----------------|
| 11     | 9.753          | Asp   | 6749628  | 2.28       | 7.68                        | 1022.79         |
| 13     | 14.420         | Thr   | 1310334  | 1.09       | 1.43                        | 170.06          |
| 14     | 15.873         | Ser   | 3262846  | 1.63       | 3.54                        | 371.82          |
| 16     | 19.713         | Glu   | 10733478 | 1.22       | 11.91                       | 1752.67         |
| 20     | 33.920         | Gly   | 239121   | 2.81       | 0.25                        | 19.01           |
| 21     | 35.833         | Ala   | 1432720  | 1.94       | 1.49                        | 132.95          |
| 24     | 41.760         | Val   | 406067   | 2.75       | 0.41                        | 47.75           |
| 26     | 43.167         | Cys   | 71192    | 0.92       | 0.06                        | 15.04           |
| 27     | 44.673         | Met   | 4717     | 0.00       | 0.00                        | 0.69            |
| 28     | 47.967         | Ile   | 246694   | 0.00       | 0.24                        | 31.41           |
| 29     | 49.633         | Leu   | 479274   | 1.55       | 0.47                        | 62.19           |
| 30     | 51.253         | Tyr   | 445646   | 1.48       | 0.44                        | 80.54           |
| 31     | 53.893         | Phe   | 337667   | 2.62       | 0.34                        | 56.75           |
| 36     | 61.233         | g-ABA | 512740   | 4.07       | 0.53                        | 54.93           |
| 40     | 73.193         | Orn   | 44164    | 2.14       | 0.03                        | 4.13            |
| 41     | 74.887         | Lys   | 564791   | 1.70       | 0.49                        | 71.58           |
| 44     | 77.720         | His   | 368086   | 0.30       | 0.34                        | 52.27           |
| 46     | 87.167         | Arg   | 2723840  | 1.04       | 2.72                        | 473.69          |

|     |  |  |          |  |       |  |
|-----|--|--|----------|--|-------|--|
| Sum |  |  | 29933005 |  | 32.40 |  |
|-----|--|--|----------|--|-------|--|

## VIS 2 result

| Peak # | Retention Time | Name | Area   | Resolution | Mol concentration (nmol/mg) | CalcMol (ng/mg) |
|--------|----------------|------|--------|------------|-----------------------------|-----------------|
| 8      | 31.807         | Pro  | 123031 | 5.42       | 0.45                        | 51.49           |

|     |  |  |        |  |      |  |
|-----|--|--|--------|--|------|--|
| Sum |  |  | 123031 |  | 0.45 |  |
|-----|--|--|--------|--|------|--|
