# Supplementary material for: Dynamic Variation of Amino Acid Contents and Identification of Sterols in Xinyang Mao Jian Green Tea
Source: MDPI journal article supplement (doi:10.3390/molecules27113562), 2022-06-01
Supplement: s1 [file s1]

# Hitachi Amino Acid Analyzer Report

Data File: E:\data\20210701 PF\PF-sm-chaye-yp202129670-sample-12-6ul-2021-7-3 9-42-36.dat  
 Method: E:\data\20210701 PF\sm-chaye.met  
 Sample ID: {Sample ID}  
 Vial Number: 162 Inj. Volume(uL): 6

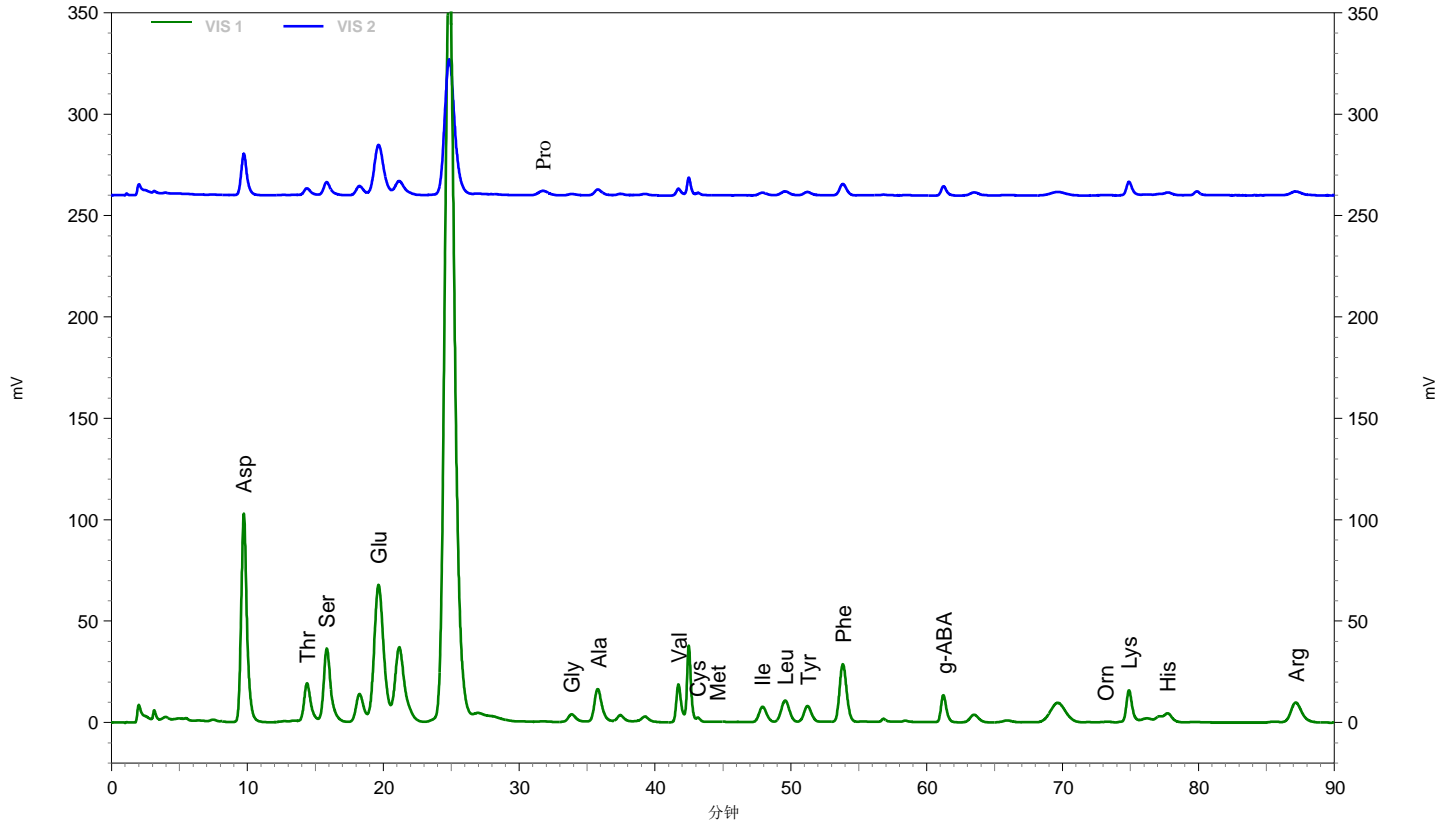

## VIS 1 result

| Peak # | Retention Time | Name  | Area     | Resolution | Mol concentration (nmol/mg) | CalcMol (ng/mg) |
|--------|----------------|-------|----------|------------|-----------------------------|-----------------|
| 10     | 9.733          | Asp   | 12096433 | 1.57       | 13.80                       | 1836.68         |
| 13     | 14.387         | Thr   | 2643197  | 0.80       | 2.89                        | 343.74          |
| 14     | 15.847         | Ser   | 5343692  | 1.61       | 5.81                        | 610.16          |
| 16     | 19.660         | Glu   | 13300112 | 1.18       | 14.79                       | 2176.13         |
| 21     | 33.873         | Gly   | 630790   | 1.95       | 0.67                        | 50.25           |
| 22     | 35.793         | Ala   | 2582244  | 1.86       | 2.70                        | 240.11          |
| 25     | 41.733         | Val   | 1825163  | 2.80       | 1.84                        | 215.03          |
| 27     | 43.160         | Cys   | 174976   | 0.95       | 0.15                        | 37.03           |
| 28     | 44.567         | Met   | 13033    | 1.59       | 0.01                        | 1.90            |
| 29     | 47.927         | Ile   | 1160694  | 3.45       | 1.13                        | 148.07          |
| 30     | 49.587         | Leu   | 1759868  | 1.53       | 1.74                        | 228.82          |
| 31     | 51.233         | Tyr   | 1182670  | 1.53       | 1.18                        | 214.18          |
| 32     | 53.840         | Phe   | 4116146  | 2.61       | 4.20                        | 693.11          |
| 37     | 61.240         | g-ABA | 1475401  | 4.02       | 1.54                        | 158.39          |
| 42     | 73.320         | Orn   | 58839    | 1.53       | 0.04                        | 5.51            |
| 43     | 74.893         | Lys   | 1959790  | 1.62       | 1.70                        | 248.86          |
| 46     | 77.733         | His   | 761251   | 0.00       | 0.70                        | 108.31          |
| 49     | 87.173         | Arg   | 2165996  | 1.28       | 2.17                        | 377.43          |

|     |  |  |          |  |       |  |
|-----|--|--|----------|--|-------|--|
| SUM |  |  | 53250295 |  | 57.05 |  |
|-----|--|--|----------|--|-------|--|

## VIS 2 result

| Peak # | Retention Time | Name | Area   | Resolution | Mol concentration (nmol/mg) | CalcMol (ng/mg) |
|--------|----------------|------|--------|------------|-----------------------------|-----------------|
| 8      | 31.747         | Pro  | 393380 | 5.20       | 1.43                        | 164.97          |

|     |  |  |        |  |      |  |
|-----|--|--|--------|--|------|--|
| SUM |  |  | 393380 |  | 1.43 |  |
|-----|--|--|--------|--|------|--|
