# Supplementary material for: Dynamic Variation of Amino Acid Contents and Identification of Sterols in Xinyang Mao Jian Green Tea
Source: MDPI journal article supplement (doi:10.3390/molecules27113562), 2022-06-01
Supplement: s1 [file s1]

# umHitachi Amino Acid Analyzer Report

Data File: E:\data\20210701 PF\PF-sm-chaye-yp202129670-sample-4-6ul-2021-7-2 13-07-43.dat  
 Method: E:\data\20210701 PF\sm-chaye.met  
 Sample ID: {Sample ID}  
 Vial Number: 154 Inj. Volume(uL): 6

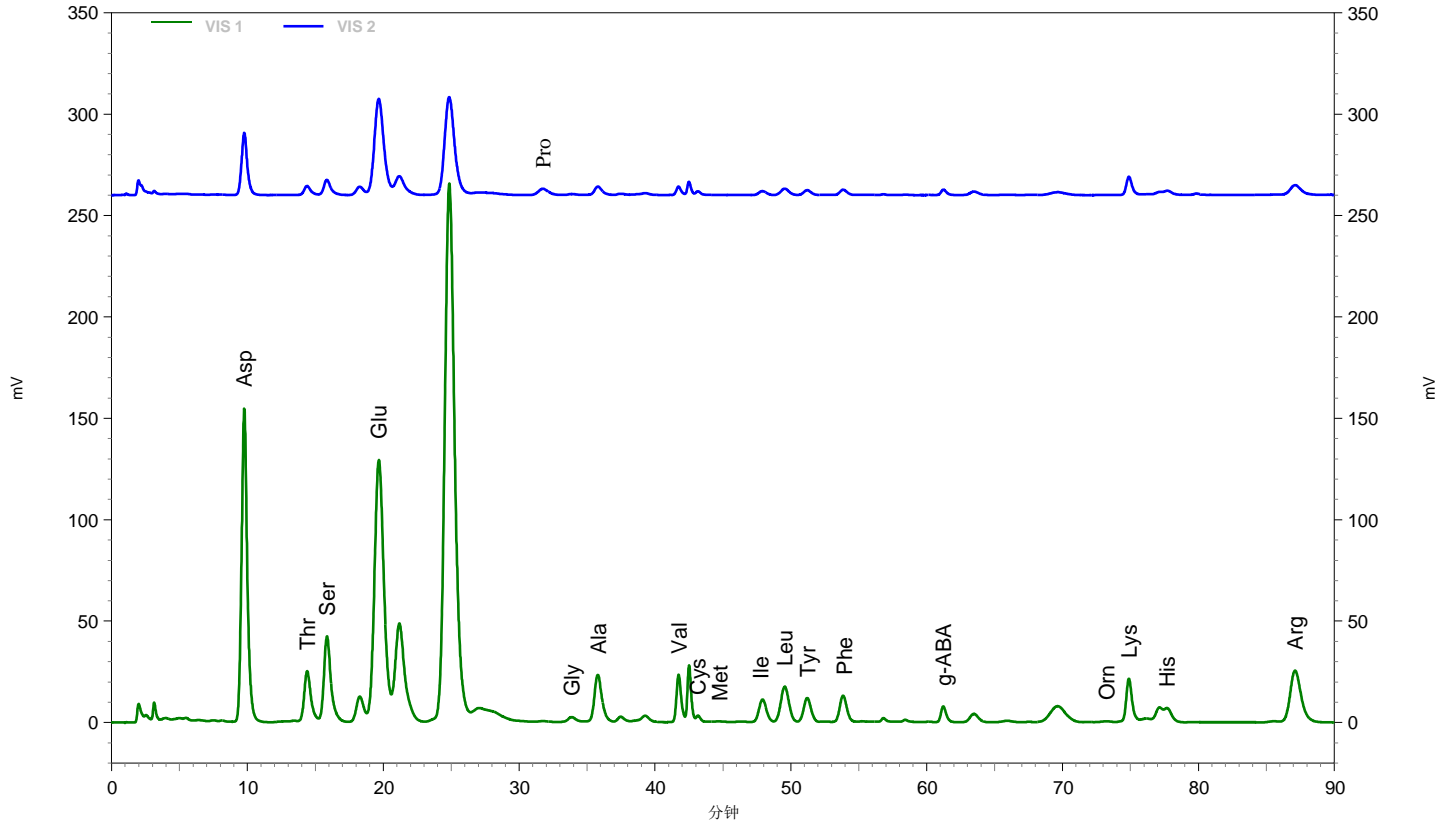

## VIS 1 result

| Peak # | Retention Time | Name  | Area     | Resolution | Mol concentration (nmol/mg) | CalcMol (ng/mg) |
|--------|----------------|-------|----------|------------|-----------------------------|-----------------|
| 11     | 9.767          | Asp   | 18148749 | 1.76       | 20.68                       | 2752.88         |
| 14     | 14.400         | Thr   | 3450608  | 0.83       | 3.76                        | 448.29          |
| 15     | 15.853         | Ser   | 6144424  | 1.61       | 6.67                        | 700.89          |
| 17     | 19.673         | Glu   | 25328141 | 1.18       | 28.14                       | 4139.97         |
| 22     | 33.873         | Gly   | 342202   | 1.83       | 0.36                        | 27.23           |
| 23     | 35.800         | Ala   | 3479309  | 1.94       | 3.63                        | 323.20          |
| 26     | 41.740         | Val   | 2260862  | 2.75       | 2.27                        | 266.10          |
| 28     | 43.167         | Cys   | 274723   | 1.11       | 0.24                        | 58.09           |
| 29     | 44.720         | Met   | 24998    | 1.94       | 0.02                        | 3.64            |
| 30     | 47.920         | Ile   | 1724353  | 3.27       | 1.67                        | 219.75          |
| 31     | 49.560         | Leu   | 2939387  | 1.50       | 2.91                        | 381.80          |
| 32     | 51.220         | Tyr   | 1794134  | 1.54       | 1.79                        | 324.59          |
| 33     | 53.853         | Phe   | 1847170  | 2.65       | 1.88                        | 310.73          |
| 39     | 61.233         | g-ABA | 848534   | 1.50       | 0.88                        | 91.00           |
| 44     | 73.240         | Orn   | 80985    | 1.38       | 0.06                        | 7.57            |
| 45     | 74.887         | Lys   | 2662216  | 1.57       | 2.31                        | 337.72          |
| 48     | 77.693         | His   | 1085129  | 0.27       | 0.99                        | 154.24          |
| 50     | 87.120         | Arg   | 5807124  | 1.00       | 5.80                        | 1010.89         |

|     |  |  |          |  |       |  |
|-----|--|--|----------|--|-------|--|
| Sum |  |  | 78243048 |  | 84.09 |  |
|-----|--|--|----------|--|-------|--|

## VIS 2 result

| Peak # | Retention Time | Name | Area   | Resolution | Mol concentration (nmol/mg) | CalcMol (ng/mg) |
|--------|----------------|------|--------|------------|-----------------------------|-----------------|
| 8      | 31.747         | Pro  | 586388 | 5.19       | 2.13                        | 245.67          |

|     |  |  |        |  |      |  |
|-----|--|--|--------|--|------|--|
| Sum |  |  | 586388 |  | 2.13 |  |
|-----|--|--|--------|--|------|--|
