# Supplementary material for: Dynamic Variation of Amino Acid Contents and Identification of Sterols in Xinyang Mao Jian Green Tea
Source: MDPI journal article supplement (doi:10.3390/molecules27113562), 2022-06-01
Supplement: s1 [file s1]

# Hitachi Amino Acid Analyzer Report

Data File: E:\data\20210701 PF\PF-sm-chaye-yp202129670-sample-1-7-6ul-2021-7-2 7-31-03.dat  
Method: E:\data\20210701 PF\sm-chaye.met  
Sample ID: {Sample ID}  
Vial Number: 151 Inj. Volume(uL): 6

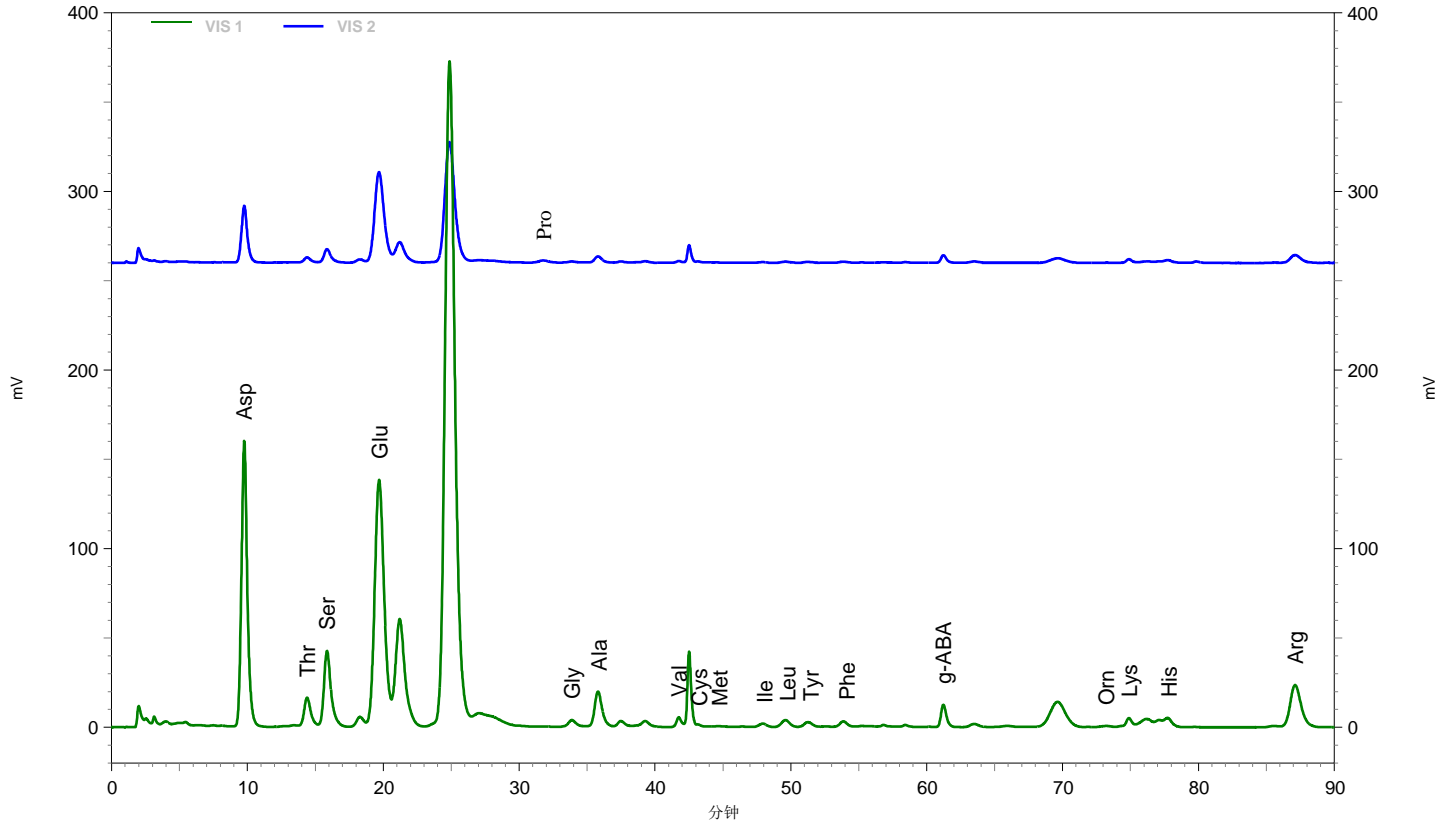

## VIS 1 result

| Peak # | Retention Time | Name  | Area     | Resolution | Mol concentration (nmol/mg) | CalcMol (ng/mg) |
|--------|----------------|-------|----------|------------|-----------------------------|-----------------|
| 11     | 9.767          | Asp   | 19258446 | 1.54       | 21.91                       | 2916.83         |
| 14     | 14.400         | Thr   | 2267927  | 0.91       | 2.47                        | 294.20          |
| 15     | 15.867         | Ser   | 6192509  | 1.61       | 6.71                        | 705.32          |
| 17     | 19.693         | Glu   | 27156121 | 1.17       | 30.13                       | 4432.11         |
| 21     | 33.887         | Gly   | 624519   | 2.62       | 0.66                        | 49.62           |
| 22     | 35.807         | Ala   | 3092234  | 1.86       | 3.22                        | 286.81          |
| 25     | 41.753         | Val   | 536786   | 2.70       | 0.54                        | 63.08           |
| 27     | 43.147         | Cys   | 94180    | 0.67       | 0.08                        | 19.88           |
| 28     | 44.673         | Met   | 22816    | 1.32       | 0.02                        | 3.31            |
| 30     | 47.940         | Ile   | 271574   | 1.43       | 0.26                        | 34.56           |
| 31     | 49.613         | Leu   | 627814   | 1.56       | 0.62                        | 81.43           |
| 32     | 51.267         | Tyr   | 423064   | 1.48       | 0.42                        | 76.42           |
| 33     | 53.873         | Phe   | 417729   | 2.53       | 0.42                        | 70.16           |
| 39     | 61.227         | g-ABA | 1379576  | 1.37       | 1.43                        | 147.73          |
| 43     | 73.240         | Orn   | 108954   | 2.13       | 0.08                        | 10.17           |
| 44     | 74.887         | Lys   | 661378   | 1.58       | 0.57                        | 83.77           |
| 47     | 77.727         | His   | 868616   | 0.28       | 0.79                        | 123.28          |
| 49     | 87.120         | Arg   | 5425489  | 0.96       | 5.41                        | 943.04          |

|     |  |  |          |  |       |  |
|-----|--|--|----------|--|-------|--|
| Sum |  |  | 69429732 |  | 75.77 |  |
|-----|--|--|----------|--|-------|--|

## VIS 2 result

| Peak # | Retention Time | Name | Area   | Resolution | Mol concentration (nmol/mg) | CalcMol (ng/mg) |
|--------|----------------|------|--------|------------|-----------------------------|-----------------|
| 8      | 31.813         | Pro  | 213084 | 5.27       | 0.77                        | 89.14           |

|     |  |  |        |  |      |  |
|-----|--|--|--------|--|------|--|
| Sum |  |  | 213084 |  | 0.77 |  |
|-----|--|--|--------|--|------|--|
