# Supplementary material for: Dynamic Variation of Amino Acid Contents and Identification of Sterols in Xinyang Mao Jian Green Tea
Source: MDPI journal article supplement (doi:10.3390/molecules27113562), 2022-06-01
Supplement: s1 [file s1]

# Hitachi Amino Acid Analyzer Report

Data File: E:\data\20210701 PF\PF-sm-chaye-yp202129670-sample-11-6ul-2021-7-3 7-50-20.dat  
Method: E:\data\20210701 PF\sm-thea.met  
Sample ID: {Sample ID}  
Vial Number: 161 Inj. Volume(uL): 6

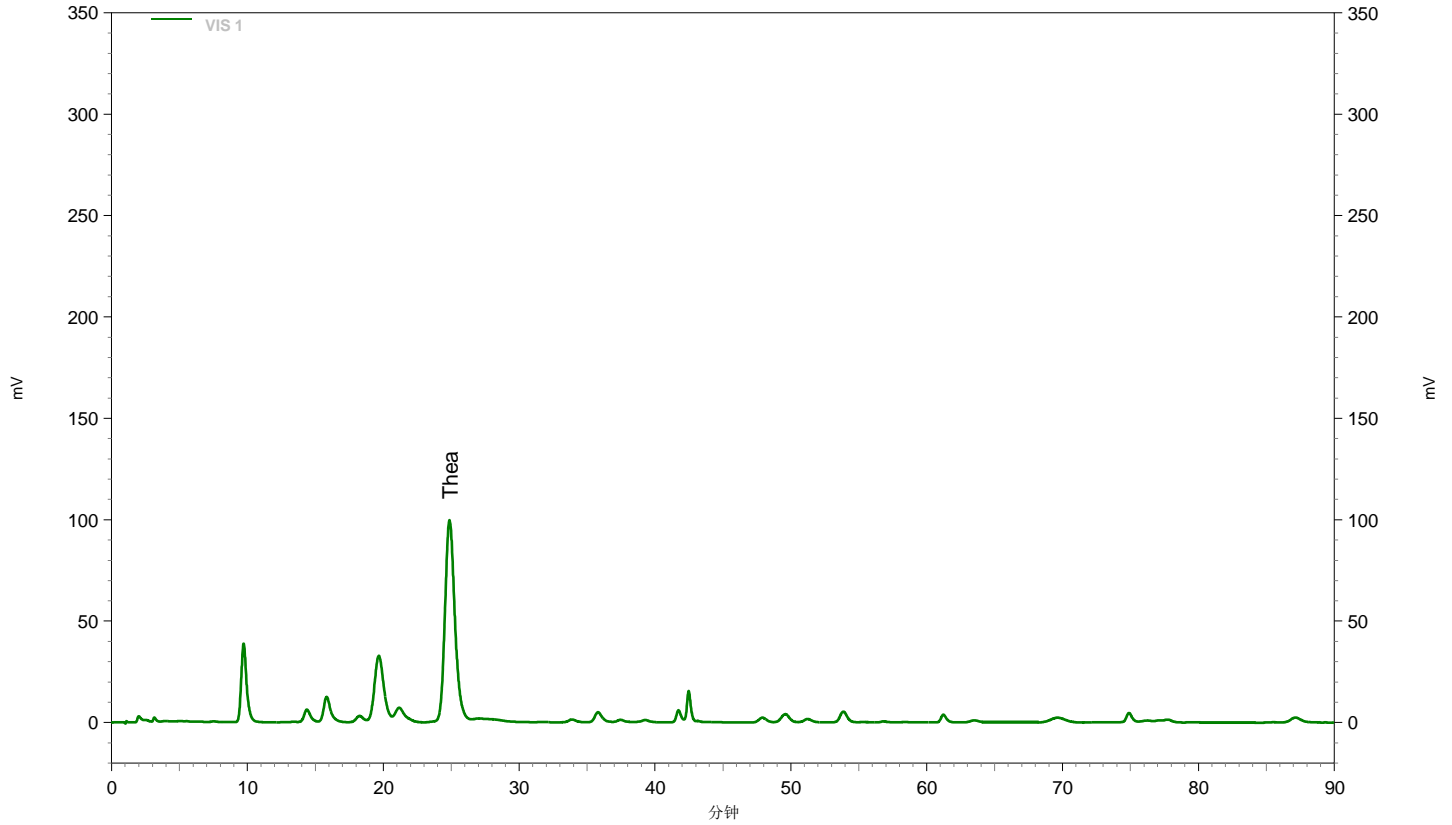

## VIS 1 result

| Peak # | Retention Time | Name | Area     | Resolution | Mol concentration (nmol/mg) | CalcMol (ng/mg) |
|--------|----------------|------|----------|------------|-----------------------------|-----------------|
| 18     | 24.887         | Thea | 20344237 | 2.74       | 23.93                       | 4168.00         |

|     |  |  |          |  |       |  |
|-----|--|--|----------|--|-------|--|
| SUM |  |  | 20344237 |  | 23.93 |  |
|-----|--|--|----------|--|-------|--|

## VIS 2 result

| Peak # | Retention Time | Name | Area | Resolution | Mol concentration (nmol/mg) | CalcMol (ng/mg) |
|--------|----------------|------|------|------------|-----------------------------|-----------------|
|--------|----------------|------|------|------------|-----------------------------|-----------------|
