# Supplementary material for: Dynamic Variation of Amino Acid Contents and Identification of Sterols in Xinyang Mao Jian Green Tea
Source: MDPI journal article supplement (doi:10.3390/molecules27113562), 2022-06-01
Supplement: s1 [file s1]

# Hitachi Amino Acid Analyzer Report

Data File: E:\data\20210701 PF\PF-sm-chaye-yp202129670-sample-11-6ul-2021-7-3 7-50-20.dat  
Method: E:\data\20210701 PF\sm-asn.met  
Sample ID: {Sample ID}  
Vial Number: 161 Inj. Volume(uL): 6

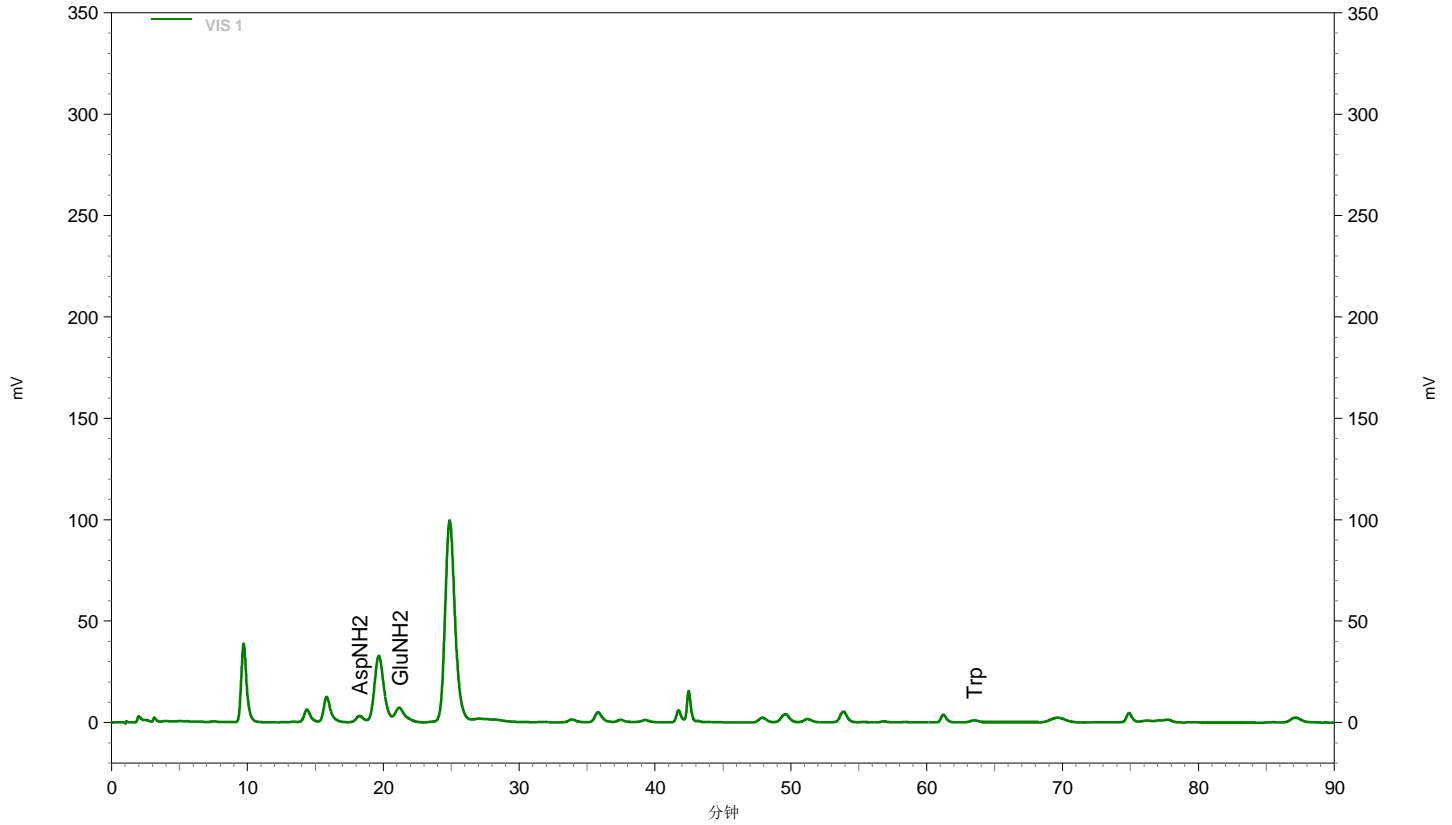

## VIS 1 result

| Peak # | Retention Time | Name   | Area    | Resolution | Mol concentration (nmol/mg) | CalcMol (ng/mg) |
|--------|----------------|--------|---------|------------|-----------------------------|-----------------|
| 15     | 18.267         | AspNH2 | 458866  | 2.52       | 0.64                        | 84.87           |
| 17     | 21.180         | GluNH2 | 1505979 | 1.12       | 1.84                        | 269.42          |
| 34     | 63.513         | Trp    | 165896  | 2.40       | 0.26                        | 53.08           |
| SUM    |                |        | 2130741 |            | 2.75                        |                 |

## VIS 2 result

| Peak # | Retention Time | Name | Area | Resolution | Mol concentration (nmol/mg) | CalcMol (ng/mg) |
|--------|----------------|------|------|------------|-----------------------------|-----------------|
|--------|----------------|------|------|------------|-----------------------------|-----------------|
