# Supplementary material for: Dynamic Variation of Amino Acid Contents and Identification of Sterols in Xinyang Mao Jian Green Tea
Source: MDPI journal article supplement (doi:10.3390/molecules27113562), 2022-06-01
Supplement: s1 [file s1]

# Hitachi Amino Acid Analyzer Report

Data File: E:\data\20210701 PF\PF-sm-chaye-yp202129670-sample-12-6ul-2021-7-3 9-42-36.dat  
Method: E:\data\20210701 PF\sm-asn.met  
Sample ID: {Sample ID}  
Vial Number: 162 Inj. Volume(uL): 6

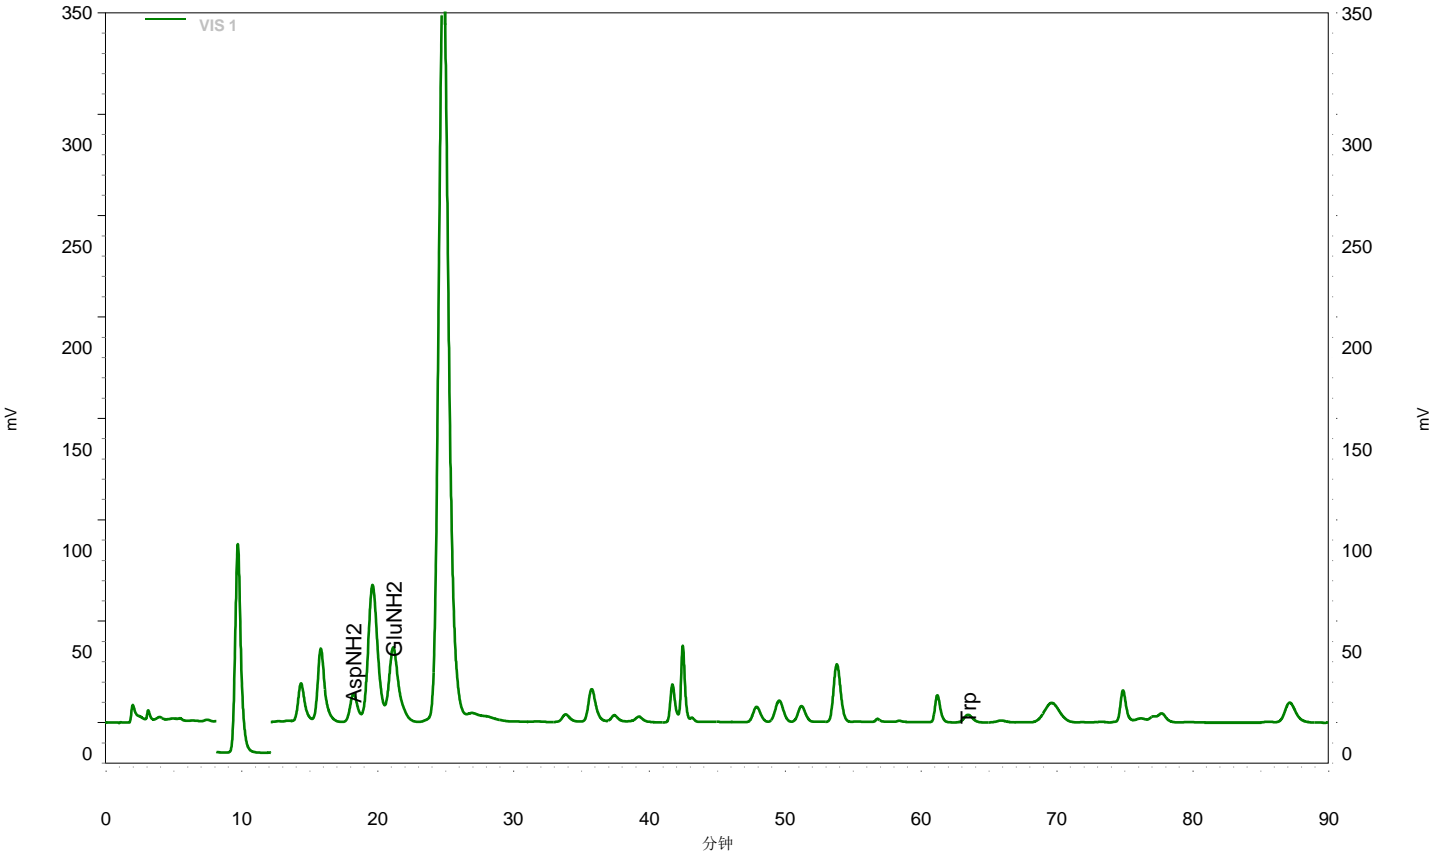

| VIS 1 result |                |        |          |            |                             |                 |
|--------------|----------------|--------|----------|------------|-----------------------------|-----------------|
| Peak #       | Retention Time | Name   | Area     | Resolution | Mol concentration (nmol/mg) | CalcMol (ng/mg) |
| 15           | 18.260         | AspNH2 | 2109091  | 2.45       | 2.95                        | 390.29          |
| 17           | 21.187         | GluNH2 | 7497620  | 1.17       | 9.19                        | 1342.02         |
| 38           | 63.493         | Trp    | 657679   | 2.35       | 1.03                        | 210.53          |
| SUM          |                |        | 10264390 |            | 13.17                       |                 |

| VIS 2 result |                |      |      |            |                             |                 |
|--------------|----------------|------|------|------------|-----------------------------|-----------------|
| Peak #       | Retention Time | Name | Area | Resolution | Mol concentration (nmol/mg) | CalcMol (ng/mg) |
