# Supplementary material for: Dynamic Variation of Amino Acid Contents and Identification of Sterols in Xinyang Mao Jian Green Tea
Source: MDPI journal article supplement (doi:10.3390/molecules27113562), 2022-06-01
Supplement: s1 [file s1]

# Hitachi Amino Acid Analyzer Report

Data File: E:\data\20210701 PF\PF-sm-chaye-yp202129670-sample-2-6ul-2021-7-2 9-23-14.dat  
Method: E:\data\20210701 PF\sm-thea.met  
Sample ID: {Sample ID}  
Vial Number: 152 Inj. Volume(uL): 6

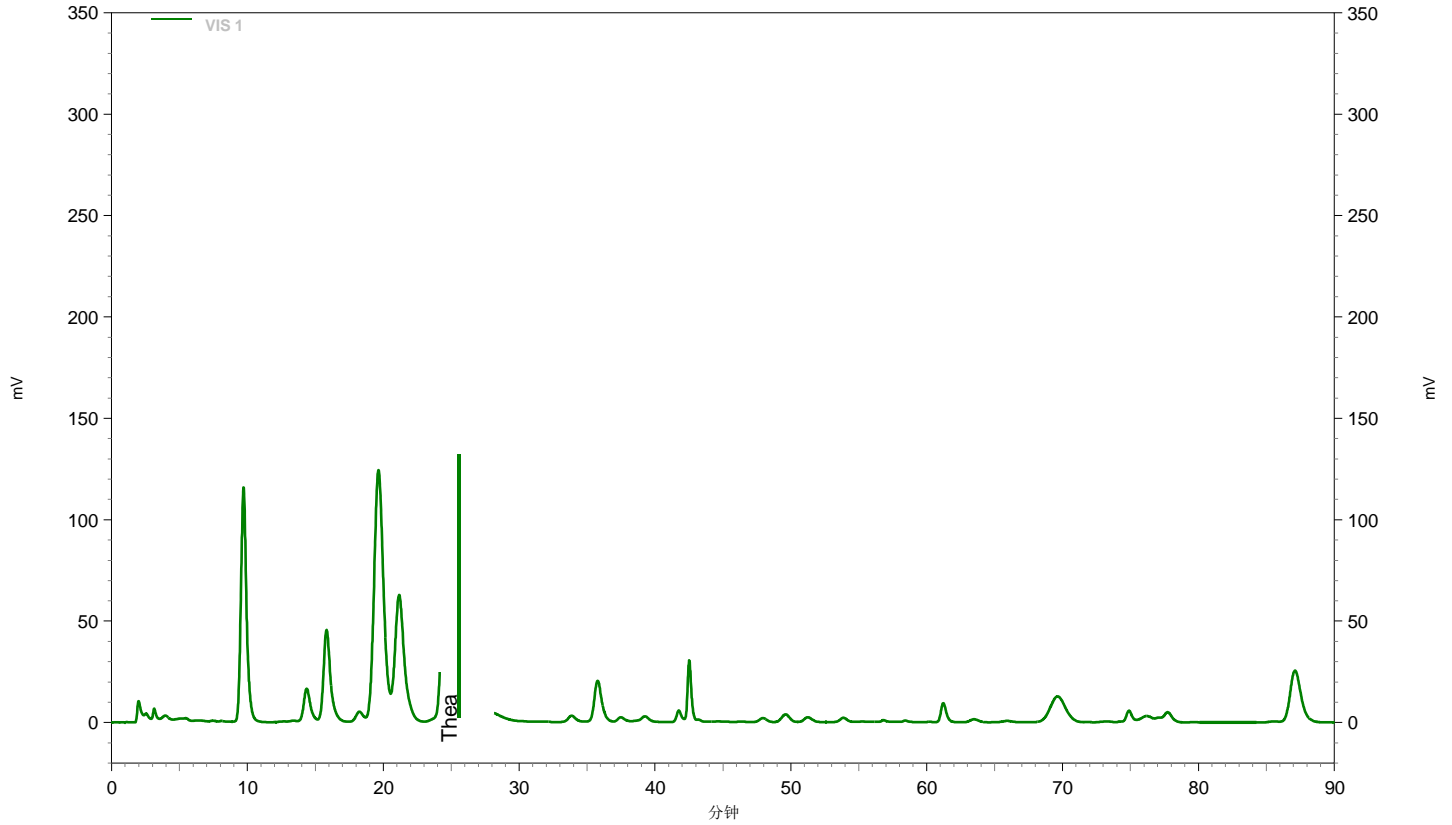

## VIS 1 result

| Peak # | Retention Time | Name | Area     | Resolution | Mol concentration (nmol/mg) | CalcMol (ng/mg) |
|--------|----------------|------|----------|------------|-----------------------------|-----------------|
| 18     | 24.847         | Thea | 65352419 | 2.81       | 76.78                       | 13375.62        |
| Sum    |                |      | 65352419 |            | 76.78                       |                 |

## VIS 2 result

| Peak # | Retention Time | Name | Area | Resolution | Mol concentration (nmol/mg) | CalcMol (ng/mg) |
|--------|----------------|------|------|------------|-----------------------------|-----------------|
|--------|----------------|------|------|------------|-----------------------------|-----------------|
