# Supplementary material for: Dynamic Variation of Amino Acid Contents and Identification of Sterols in Xinyang Mao Jian Green Tea
Source: MDPI journal article supplement (doi:10.3390/molecules27113562), 2022-06-01
Supplement: s1 [file s1]

# Hitachi Amino Acid Analyzer Report

Data File: E:\data\20210701 PF\PF-sm-chaye-yp202129670-sample-2-6ul-2021-7-2 9-23-14.dat  
 Method: E:\data\20210701 PF\sm-chaye.met  
 Sample ID: {Sample ID}  
 Vial Number: 152 Inj. Volume(uL): 6

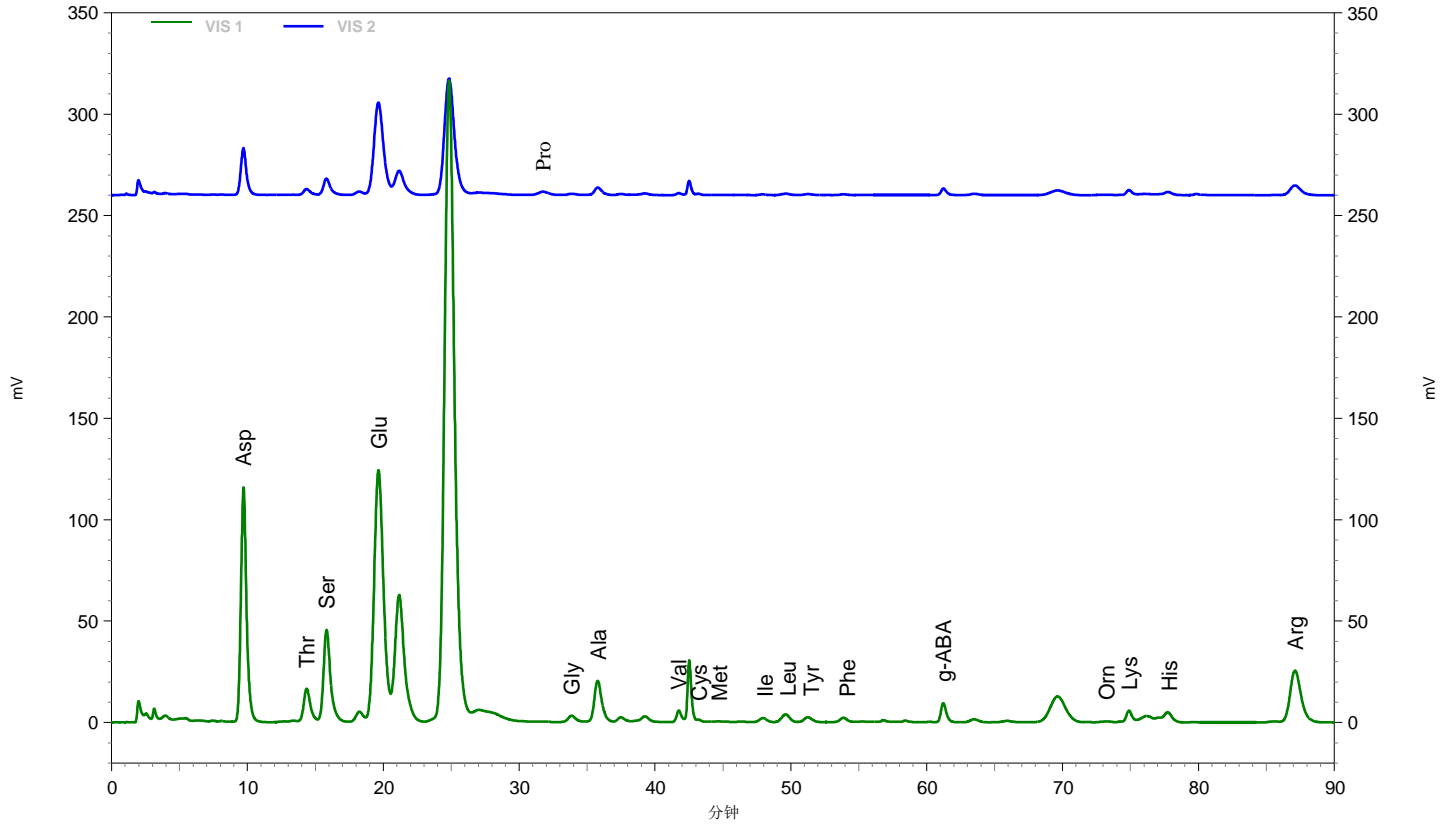

## VIS 1 result

| Peak # | Retention Time | Name  | Area     | Resolution | Mol concentration (nmol/mg) | CalcMol (ng/mg) |
|--------|----------------|-------|----------|------------|-----------------------------|-----------------|
| 11     | 9.713          | Asp   | 13438670 | 1.66       | 15.31                       | 2037.42         |
| 13     | 14.360         | Thr   | 2210892  | 1.05       | 2.41                        | 287.09          |
| 14     | 15.827         | Ser   | 6519553  | 1.64       | 7.07                        | 743.31          |
| 16     | 19.647         | Glu   | 24181552 | 1.19       | 26.86                       | 3950.58         |
| 21     | 33.873         | Gly   | 520627   | 1.85       | 0.55                        | 41.41           |
| 22     | 35.793         | Ala   | 3167028  | 1.87       | 3.30                        | 294.04          |
| 25     | 41.753         | Val   | 560141   | 2.75       | 0.56                        | 65.89           |
| 27     | 43.167         | Cys   | 87576    | 0.80       | 0.08                        | 18.51           |
| 28     | 44.633         | Met   | 9531     | 1.65       | 0.01                        | 1.39            |
| 29     | 47.947         | Ile   | 287361   | 3.96       | 0.28                        | 36.60           |
| 30     | 49.620         | Leu   | 627604   | 1.56       | 0.62                        | 81.48           |
| 31     | 51.267         | Tyr   | 377694   | 1.49       | 0.38                        | 68.30           |
| 32     | 53.873         | Phe   | 286324   | 2.55       | 0.29                        | 48.14           |
| 37     | 61.233         | g-ABA | 1039843  | 3.99       | 1.08                        | 111.46          |
| 41     | 73.280         | Orn   | 87911    | 2.13       | 0.06                        | 8.22            |
| 42     | 74.893         | Lys   | 748638   | 1.55       | 0.65                        | 94.92           |
| 44     | 77.740         | His   | 1125177  | 0.93       | 1.03                        | 159.85          |
| 46     | 87.113         | Arg   | 5841462  | 0.94       | 5.83                        | 1016.36         |

|     |  |  |          |  |       |  |
|-----|--|--|----------|--|-------|--|
| Sum |  |  | 61117584 |  | 66.37 |  |
|-----|--|--|----------|--|-------|--|

## VIS 2 result

| Peak # | Retention Time | Name | Area   | Resolution | Mol concentration (nmol/mg) | CalcMol (ng/mg) |
|--------|----------------|------|--------|------------|-----------------------------|-----------------|
| 8      | 31.747         | Pro  | 280450 | 5.25       | 1.02                        | 117.44          |

|     |  |  |        |  |      |  |
|-----|--|--|--------|--|------|--|
| Sum |  |  | 280450 |  | 1.02 |  |
|-----|--|--|--------|--|------|--|
