# Supplementary material for: Dynamic Variation of Amino Acid Contents and Identification of Sterols in Xinyang Mao Jian Green Tea
Source: MDPI journal article supplement (doi:10.3390/molecules27113562), 2022-06-01
Supplement: s1 [file s1]

# Hitachi Amino Acid Analyzer Report

Data File: E:\data\20210701 PF\PF-sm-chaye-yp202129670-sample-11-6ul-2021-7-3 7-50-20.dat  
Method: E:\data\20210701 PF\sm-chaye.met  
Sample ID: {Sample ID}  
Vial Number: 161 Inj. Volume(uL): 6

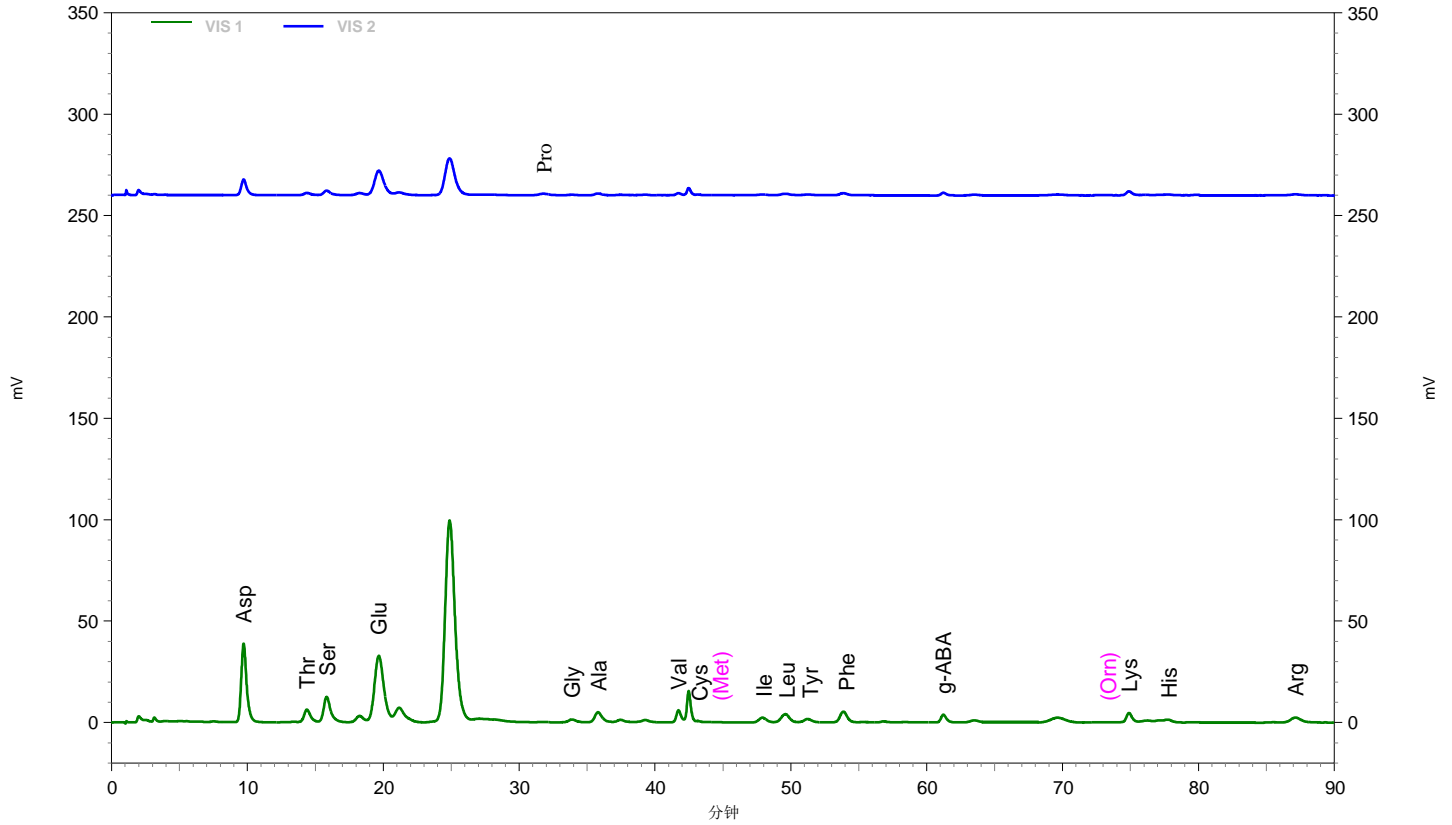

## VIS 1 result

| Peak # | Retention Time | Name  | Area    | Resolution | Mol concentration (nmol/mg) | CalcMol (ng/mg) |
|--------|----------------|-------|---------|------------|-----------------------------|-----------------|
| 11     | 9.727          | Asp   | 4298920 | 2.27       | 4.90                        | 652.41          |
| 13     | 14.393         | Thr   | 805949  | 2.38       | 0.88                        | 104.76          |
| 14     | 15.840         | Ser   | 1781452 | 1.65       | 1.93                        | 203.31          |
| 16     | 19.680         | Glu   | 6376402 | 1.22       | 7.09                        | 1042.77         |
| 20     | 33.887         | Gly   | 218884  | 2.79       | 0.23                        | 17.43           |
| 21     | 35.807         | Ala   | 735489  | 1.94       | 0.77                        | 68.35           |
| 24     | 41.740         | Val   | 574704  | 3.10       | 0.58                        | 67.67           |
| 26     | 43.153         | Cys   | 51318   | 0.90       | 0.05                        | 10.86           |
|        |                | Met   |         |            | 0.00 BDL                    | 0.00            |
| 27     | 47.927         | Ile   | 358896  | 4.81       | 0.35                        | 45.76           |
| 28     | 49.600         | Leu   | 669637  | 1.55       | 0.66                        | 87.02           |
| 29     | 51.247         | Tyr   | 246766  | 1.51       | 0.25                        | 44.67           |
| 30     | 53.867         | Phe   | 749498  | 2.59       | 0.76                        | 126.14          |
| 33     | 61.227         | g-ABA | 414520  | 4.44       | 0.43                        | 44.48           |
|        |                | Orn   |         |            | 0.00 BDL                    | 0.00            |
| 37     | 74.887         | Lys   | 563154  | 3.68       | 0.49                        | 71.48           |
| 40     | 77.740         | His   | 221570  | 0.00       | 0.20                        | 31.51           |
| 41     | 87.167         | Arg   | 509628  | 6.62       | 0.51                        | 88.76           |

|     |  |  |          |  |       |  |
|-----|--|--|----------|--|-------|--|
| SUM |  |  | 18576787 |  | 20.08 |  |
|-----|--|--|----------|--|-------|--|

## VIS 2 result

| Peak # | Retention Time | Name | Area   | Resolution | Mol concentration (nmol/mg) | CalcMol (ng/mg) |
|--------|----------------|------|--------|------------|-----------------------------|-----------------|
| 8      | 31.833         | Pro  | 113733 | 5.61       | 0.41                        | 47.67           |

|     |  |  |        |  |      |  |
|-----|--|--|--------|--|------|--|
| SUM |  |  | 113733 |  | 0.41 |  |
|-----|--|--|--------|--|------|--|
