# Supplementary material for: Dynamic Variation of Amino Acid Contents and Identification of Sterols in Xinyang Mao Jian Green Tea
Source: MDPI journal article supplement (doi:10.3390/molecules27113562), 2022-06-01
Supplement: s1 [file s1]

# Hitachi Amino Acid Analyzer Report

Data File: E:\data\20210701 PF\PF-sm-chaye-yp202129670-sample-3-6ul-2021-7-2 11-15-26.dat  
Method: E:\data\20210701 PF\sm-asn.met  
Sample ID: {Sample ID}  
Vial Number: 153 Inj. Volume(uL): 6

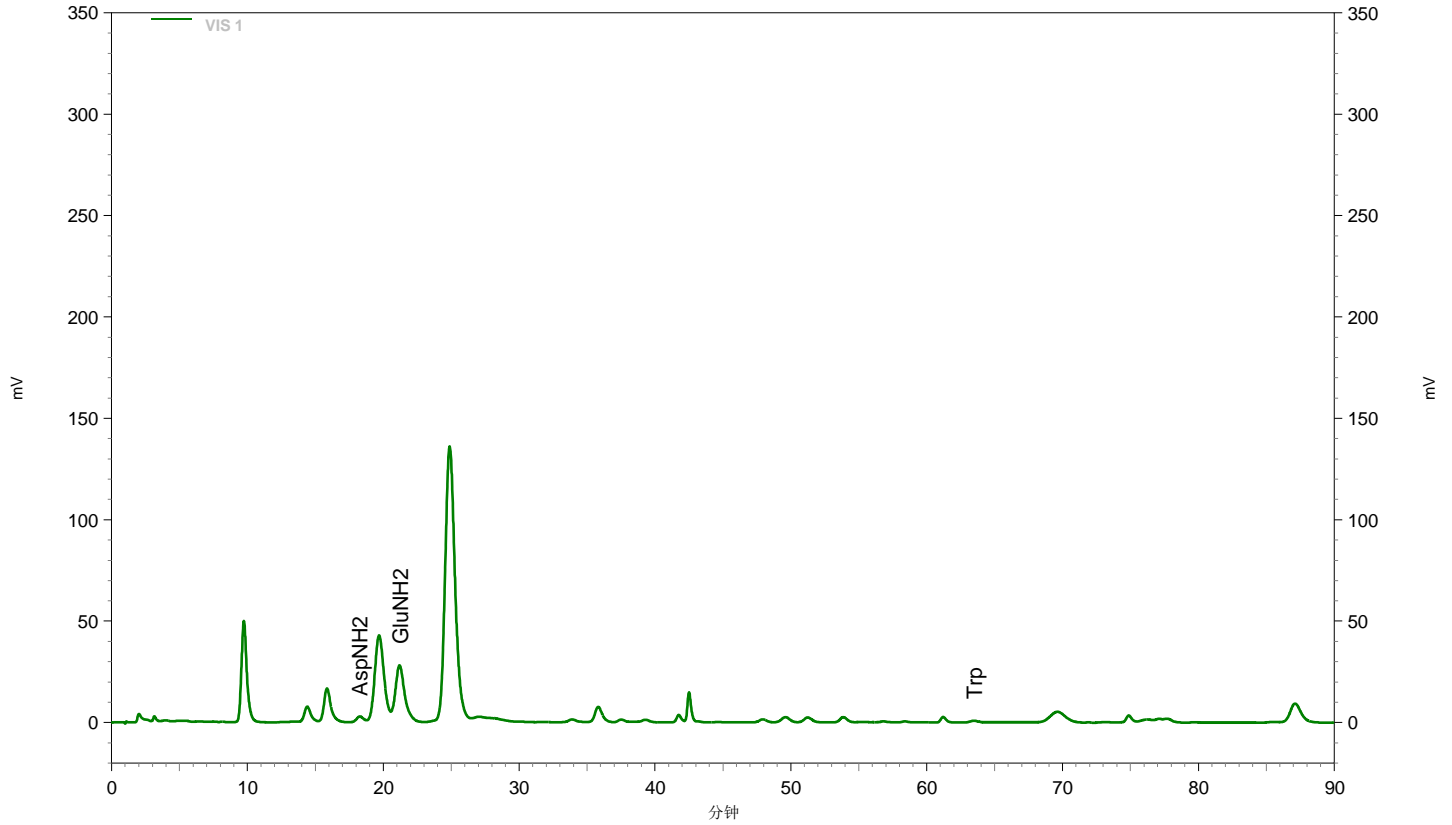

## VIS 1 result

| Peak # | Retention Time | Name   | Area    | Resolution | Mol concentration (nmol/mg) | CalcMol (ng/mg) |
|--------|----------------|--------|---------|------------|-----------------------------|-----------------|
| 14     | 18.267         | AspNH2 | 413410  | 2.49       | 0.58                        | 76.50           |
| 16     | 21.207         | GluNH2 | 5427261 | 1.20       | 6.65                        | 971.44          |
| 35     | 63.507         | Trp    | 143486  | 2.44       | 0.22                        | 45.93           |
| Sum    |                |        | 5984157 |            | 7.45                        |                 |

## VIS 2 result

| Peak # | Retention Time | Name | Area | Resolution | Mol concentration (nmol/mg) | CalcMol (ng/mg) |
|--------|----------------|------|------|------------|-----------------------------|-----------------|
|--------|----------------|------|------|------------|-----------------------------|-----------------|
