# Supplementary material for: Dynamic Variation of Amino Acid Contents and Identification of Sterols in Xinyang Mao Jian Green Tea
Source: MDPI journal article supplement (doi:10.3390/molecules27113562), 2022-06-01
Supplement: s1 [file s1]

# Dynamic Variation of Amino Acid Contents and Identification of Sterols in Xinyang Mao Jian Green Tea

Meng Sun <sup>1</sup>, Fangfang Yang <sup>2</sup>, Wanying Hou <sup>1</sup>, Shuangfeng Jiang <sup>1,3</sup>, Runqi Yang <sup>1</sup>, Wei Zhang <sup>1</sup>, Mingjie Chen <sup>1</sup>, Yuhang Yan <sup>1</sup>, Yuxin Tian <sup>1</sup> and Hongyu Yuan <sup>1,\*</sup>

Henan Key Laboratory of Tea Plant Biology, College of Life Sciences, Xinyang Normal University, Xinyang 464000, China;  
sunmeng2010abc@163.com (M.S.); battc9839bgrg0@163.com (W.H.);  
jshuangfeng@163.com (S.J.); yangrunqi246875@163.com (R.Y.);  
chawenhua2009@163.com (W.Z.); mjchen006@163.com (M.C.);  
17839865339@163.com (Y.Y.); 15516796003@163.com (Y.T.)

<sup>2</sup> Guangxi-ASEAN Food Inspection and Testing Center, Nanning 530029, China;  
yangfangfang18@126.com

<sup>3</sup> Xinyang Academy of Agricultural Sciences, Xinyang 464000, China

\* Correspondence: yhyuan@xynu.edu.cn; Tel.: +0376-6391289

**Instruments:**

Hitachi L-8900 Amino Acid Analyzer (Tokyo, Japan)

**Standard solutions:**

Wako Amino Acids Mixture Standard Solution, Type B 012-08643

Wako Amino Acids Mixture Standard Solution, Type AN-2 015-14461

**Preparing standard solution for analysis:**

Taking 0.100 mL of the above amino acid standard solutions and mixing totally, then adding water in constant volume to 1.000 mL.

**Chromatographic column:**

4.6 mm I.D.×60 mm L packed with Hitachi custom ion exchange resin (Particle size: 3  $\mu$ m); Hitachi L-8900 amino acid analyzer separation column: 4.6 mm × 60 mm, cation exchange resin (particle size: 3  $\mu$ m); Net analysis time: approximate 90 min, 110 min/ cycle.

**Flow rate:**

Separation buffer: 0.35 mL/min, reaction solution: 0.3 mL/min.

**Detection wavelength:** 570 nm, 440 nm

**Analysis method:** Standard analysis method of L-8900 amino acid analyzer system

Separation buffer:

**Table S1. Composition of Buffer Solution for Physiological Fluid Assay**

| Name                                          | PF-1    | PF-2    | PF-3     | PF-4    | PF-RG   |
|-----------------------------------------------|---------|---------|----------|---------|---------|
| Vessel(buffer)                                | B1      | B2      | B3       | B4      | B6      |
| Lithium concentration (N)                     | 0.09    | 0.255   | 0.721    | 1.00    | 0.20    |
| 1. Distilled water (approx.)                  | 700 mL  | 700 mL  | 700 mL   | 700 mL  | 700 mL  |
| 2. Lithium citrate (4H <sub>2</sub> O)        | 5.73 g  | 9.80 g  | 8.79 g   | 9.80 g  | -       |
| 3. Lithium chloride                           | 1.24 g  | 6.36 g  | 26.62 g  | 38.15 g | -       |
| 4. Citric acid (H <sub>2</sub> O)             | 19.90 g | 12.00 g | 11.27 g  | 3.30 g  | -       |
| 5. Lithium hydroxide                          | -       | -       | -        | -       | -       |
| 6. Ethanol                                    | 30.0 mL | 30.0 mL | 100.0 mL | -       | 30.0 mL |
| 7. Thiodiglycol                               | 5.0 mL  | 5.0 mL  | -        | -       | -       |
| 8. Benzyl alcohol                             | -       | -       | 3.0 mL   | -       | -       |
| 9. Brij-35*                                   | 4.0 mL  | 4.0 mL  | 4.0 mL   | 4.0 mL  | 4.0 mL  |
| 10. pH (nominal)                              | 2.8     | 3.7     | 3.6      | 4.1     | -       |
| 11. Total (adjust)                            | 1.0 L   | 1.0 L   | 1.0 L    | 1.0 L   | 1.0 L   |
| 12. Caprylic acid                             | 0.1 mL  | 0.1 mL  | 0.1 mL   | 0.1 mL  | 0.1 mL  |
| *Dissolve 25 g into 100mL of distilled water. |         |         |          |         |         |

**Reaction solution:**

| Vessel                           | Step | Reagent                           | Measurement    |
|----------------------------------|------|-----------------------------------|----------------|
| R1(ninhydrin)                    | 1    | Propylene glycol monomethyl ether | 979 mL         |
|                                  | 2    | Ninhydrin                         | 39 g           |
|                                  | 3    | Nitrogen bubbling, dissolution    | 5 min minimum  |
|                                  | 4    | Sodium borohydride                | 81 mg          |
|                                  | 5    | Nitrogen bubbling                 | 30 min minimum |
|                                  |      | Density                           | 0.96           |
| R2 for ninhydrin buffer solution | 1    | Distilled water                   | 336 mL         |
|                                  | 2    | Lithium acetate dihydrate         | 204 g          |
|                                  | 3    | Glacial acetic acid               | 123 mL         |
|                                  | 4    | Propylene glycol monomethyl ether | 401 mL         |
|                                  | 5    | Total                             | 1000 mL        |
|                                  | 6    | Nitrogen bubbling                 | 10 min minimum |
| R3 for 5% of Ethanol             |      | Density                           | 0.96           |
|                                  | 1    | Distilled water                   | 900 mL         |
|                                  | 2    | Ethanol                           | 50 mL          |
|                                  | 3    | Total                             | 1000 mL        |
|                                  |      | Density                           | 1.00           |

**Elution gradient:**

**Analysis  
Condition**

**B1:PF-1  
B2:PF-2  
B3:PF-3  
B4:PF-4  
B5:H<sub>2</sub>O**

**R1:Nin  
R2:Nin-Buffer  
R3:5%Ethanol**

| Time<br>(min) | %B1 | %B2 | %B3 | %B4 | %B5 | %B6 | Pump 1<br>Flow rate<br>(mL/min) | Column<br>Temp. | %R1 | %R2 | %R3 | Pump 2<br>Flow rate<br>(mL/min) |
|---------------|-----|-----|-----|-----|-----|-----|---------------------------------|-----------------|-----|-----|-----|---------------------------------|
| 0.0           | 100 | 0   | 0   | 0   | 0   | 0   | 0.350                           | 38              | 50  | 50  | 0   | 0.300                           |
| 2.0           |     |     |     |     |     |     |                                 | 30              |     |     |     |                                 |
| 21.5          | 100 | 0   | 0   | 0   | 0   | 0   |                                 |                 |     |     |     |                                 |
| 21.6          | 80  | 20  | 0   | 0   | 0   | 0   |                                 | 60              |     |     |     |                                 |
| 33.5          | 70  | 30  | 0   | 0   | 0   | 0   |                                 |                 |     |     |     |                                 |
| 33.6          | 10  | 90  | 0   | 0   | 0   | 0   |                                 |                 |     |     |     |                                 |
| 36.5          |     |     |     |     |     |     |                                 | 40              |     |     |     |                                 |
| 43.5          | 10  | 90  | 0   | 0   | 0   | 0   |                                 |                 |     |     |     |                                 |
| 43.6          | 0   | 100 | 0   | 0   | 0   | 0   |                                 |                 |     |     |     |                                 |
| 50.5          | 0   | 100 | 0   | 0   | 0   | 0   |                                 | 70              |     |     |     |                                 |
| 50.6          | 0   | 0   | 100 | 0   | 0   | 0   |                                 |                 |     |     |     |                                 |
| 68.4          |     |     |     |     |     |     |                                 | 45              |     |     |     |                                 |
| 69.5          | 0   | 0   | 100 | 0   | 0   | 0   |                                 |                 |     |     |     |                                 |
| 69.6          | 60  | 0   | 0   | 40  | 0   | 0   |                                 |                 |     |     |     |                                 |
| 75.0          | 60  | 0   | 0   | 40  | 0   | 0   |                                 |                 |     |     |     |                                 |
| 75.1          | 0   | 0   | 0   | 100 | 0   | 0   |                                 |                 |     |     |     |                                 |
| 82.0          | 0   | 0   | 0   | 100 | 0   | 0   |                                 |                 |     |     |     |                                 |
| 82.1          | 0   | 20  | 0   | 80  | 0   | 0   |                                 |                 |     |     |     |                                 |
| 92.5          |     |     |     |     |     |     |                                 | 70              |     |     |     |                                 |
| 99.5          | 0   | 20  | 0   | 80  | 0   | 0   |                                 |                 |     |     |     |                                 |
| 99.6          | 0   | 0   | 0   | 100 | 0   | 0   |                                 |                 |     |     |     |                                 |
| 112.5         | 0   | 0   | 0   | 100 | 0   | 0   |                                 |                 |     |     |     |                                 |
| 112.6         | 0   | 0   | 0   | 0   | 0   | 100 |                                 |                 |     |     |     |                                 |
| 116.0         |     |     |     |     |     |     |                                 |                 | 50  | 50  | 0   |                                 |
| 116.1         |     |     |     |     |     |     |                                 |                 | 0   | 0   | 100 |                                 |
| 121.5         | 0   | 0   | 0   | 0   | 0   | 100 |                                 |                 |     |     |     |                                 |
| 121.6         | 100 | 0   | 0   | 0   | 0   | 0   |                                 |                 |     |     |     |                                 |
| 125.0         |     |     |     |     |     |     |                                 | 38              |     |     |     |                                 |
| 126.0         |     |     |     |     |     |     |                                 |                 | 0   | 0   | 100 |                                 |
| 126.1         |     |     |     |     |     |     |                                 |                 | 50  | 50  | 0   |                                 |
| 148.0         | 100 | 0   | 0   | 0   | 0   | 0   |                                 |                 |     |     |     |                                 |
