# Supplementary material for: Dynamic Variation of Amino Acid Contents and Identification of Sterols in Xinyang Mao Jian Green Tea
Source: MDPI journal article supplement (doi:10.3390/molecules27113562), 2022-06-01
Supplement: s1 [file s1]

# Hitachi Amino Acid Analyzer Report

Data File: E:\data\20210701 PF\PF-sm-chaye-yp202129670-sample-7-6ul-2021-7-3 0-21-13.dat  
Method: E:\data\20210701 PF\sm-asn.met  
Sample ID: {Sample ID}  
Vial Number: 157 Inj. Volume(uL): 6

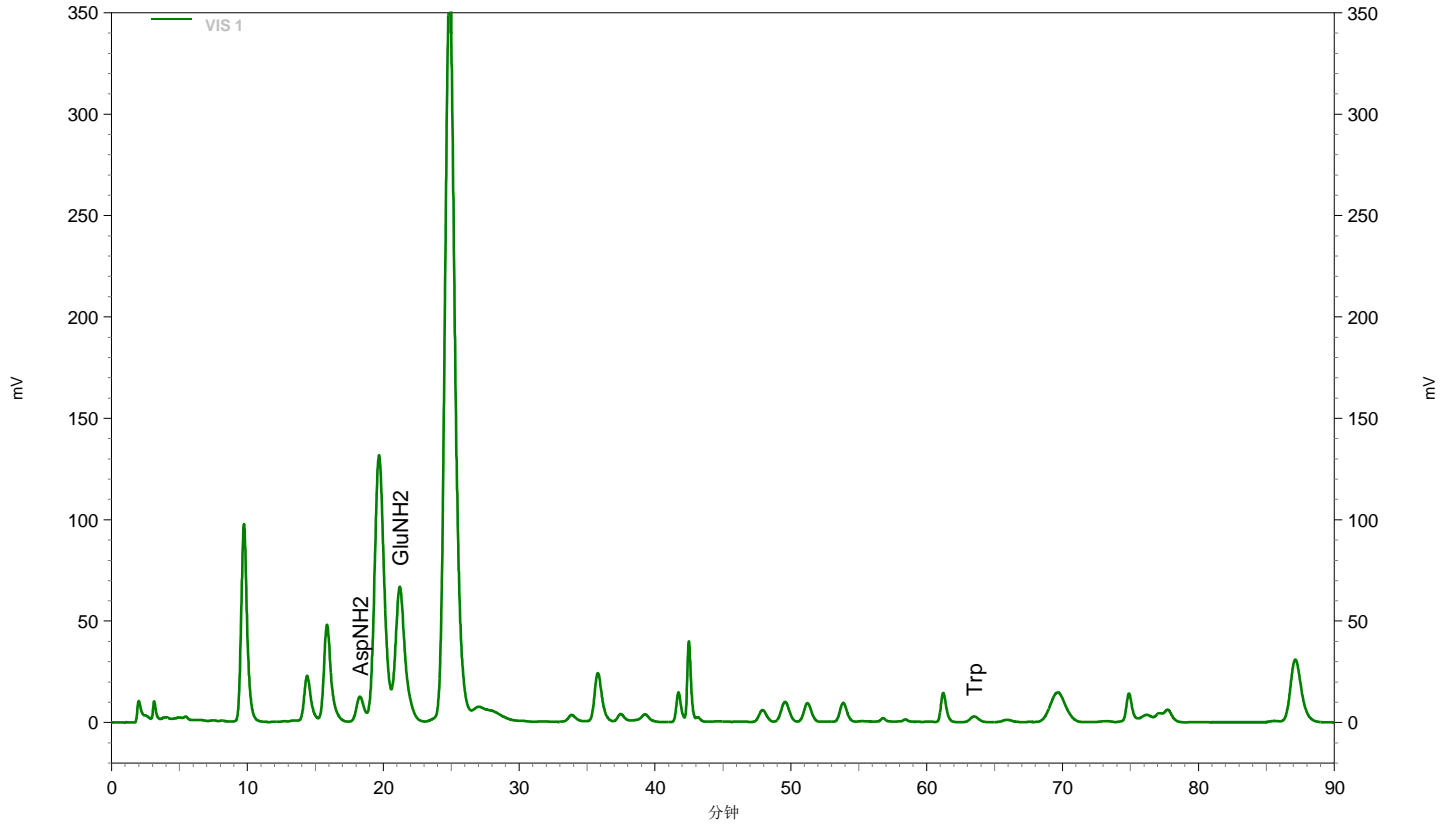

## VIS 1 result

| Peak # | Retention Time | Name   | Area     | Resolution | Mol concentration (nmol/mg) | CalcMol (ng/mg) |
|--------|----------------|--------|----------|------------|-----------------------------|-----------------|
| 15     | 18.287         | AspNH2 | 1893684  | 2.40       | 2.65                        | 349.90          |
| 17     | 21.227         | GluNH2 | 13330735 | 1.17       | 16.31                       | 2382.53         |
| 40     | 63.500         | Trp    | 493274   | 2.38       | 0.77                        | 157.66          |

|     |  |  |          |  |       |  |
|-----|--|--|----------|--|-------|--|
| Sum |  |  | 15717693 |  | 19.73 |  |
|-----|--|--|----------|--|-------|--|

## VIS 2 result

| Peak # | Retention Time | Name | Area | Resolution | Mol concentration (nmol/mg) | CalcMol (ng/mg) |
|--------|----------------|------|------|------------|-----------------------------|-----------------|
|--------|----------------|------|------|------------|-----------------------------|-----------------|
