# Supplementary material for: Dynamic Variation of Amino Acid Contents and Identification of Sterols in Xinyang Mao Jian Green Tea
Source: MDPI journal article supplement (doi:10.3390/molecules27113562), 2022-06-01
Supplement: s1 [file s1]

# Hitachi Amino Acid Analyzer Report

Data File: E:\data\20210701 PF\PF-sm-chaye-yp202129670-sample-1-6-6ul-2021-7-3 11-34-53.dat  
Method: E:\data\20210701 PF\sm-asn.met  
Sample ID: {Sample ID}  
Vial Number: 163 Inj. Volume(uL): 6

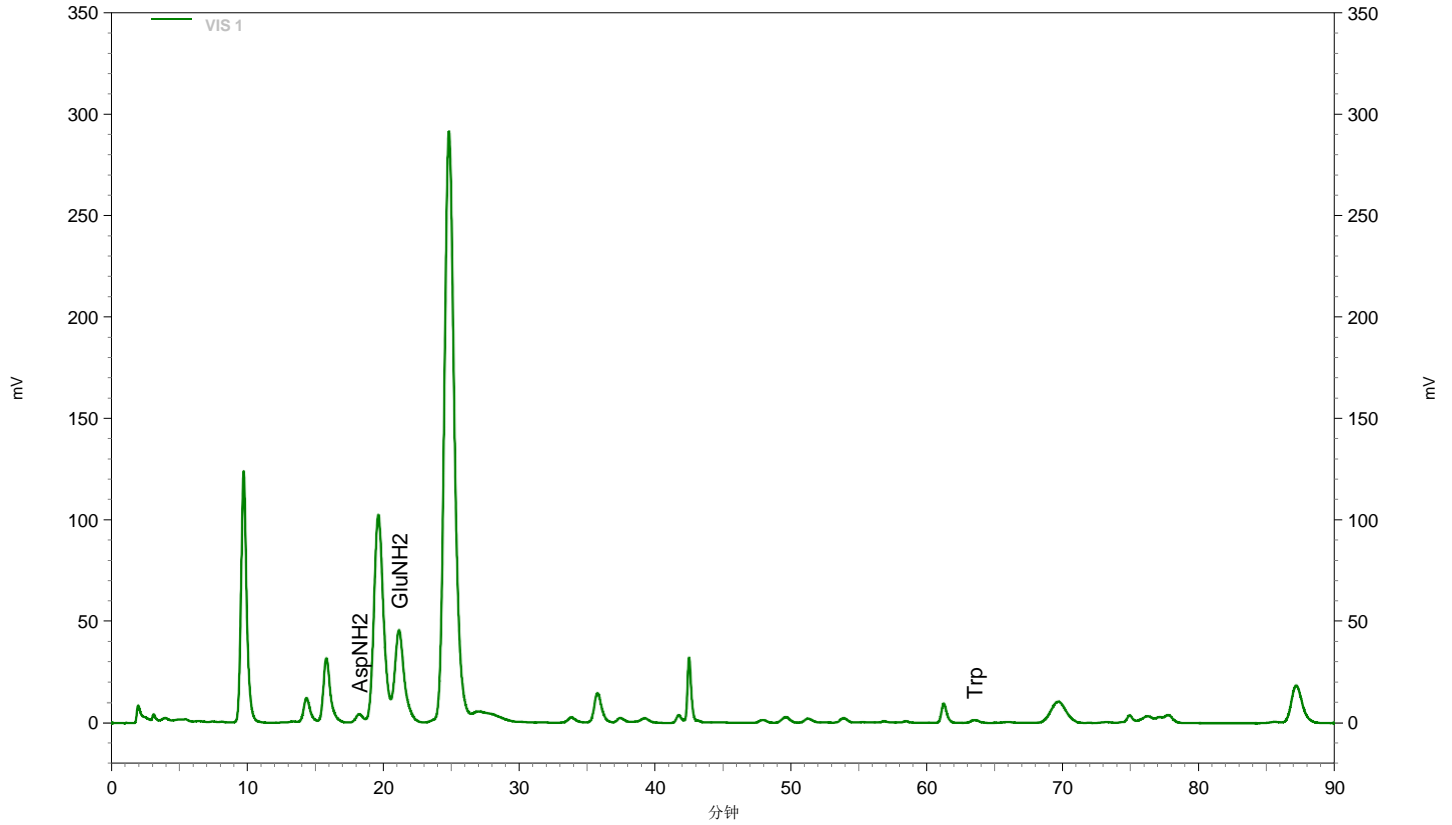

## VIS 1 result

| Peak # | Retention Time | Name   | Area    | Resolution | Mol concentration (nmol/mg) | CalcMol (ng/mg) |
|--------|----------------|--------|---------|------------|-----------------------------|-----------------|
| 14     | 18.253         | AspNH2 | 594463  | 2.48       | 0.83                        | 109.73          |
| 16     | 21.180         | GluNH2 | 9001338 | 1.18       | 11.00                       | 1607.15         |
| 36     | 63.500         | Trp    | 227287  | 2.40       | 0.36                        | 72.57           |
| Sum    |                |        | 9823088 |            | 12.19                       |                 |

## VIS 2 result

| Peak # | Retention Time | Name | Area | Resolution | Mol concentration (nmol/mg) | CalcMol (ng/mg) |
|--------|----------------|------|------|------------|-----------------------------|-----------------|
|--------|----------------|------|------|------------|-----------------------------|-----------------|
