# Supplementary material for: Dynamic Variation of Amino Acid Contents and Identification of Sterols in Xinyang Mao Jian Green Tea
Source: MDPI journal article supplement (doi:10.3390/molecules27113562), 2022-06-01
Supplement: s1 [file s1]

# Hitachi Amino Acid Analyzer Report

Data File: E:\data\20210701 PF\PF-sm-chaye-yp202129670-sample-1-7-6ul-2021-7-2 7-31-03.dat  
Method: E:\data\20210701 PF\sm-asn.met  
Sample ID: {Sample ID}  
Vial Number: 151 Inj. Volume(uL): 6

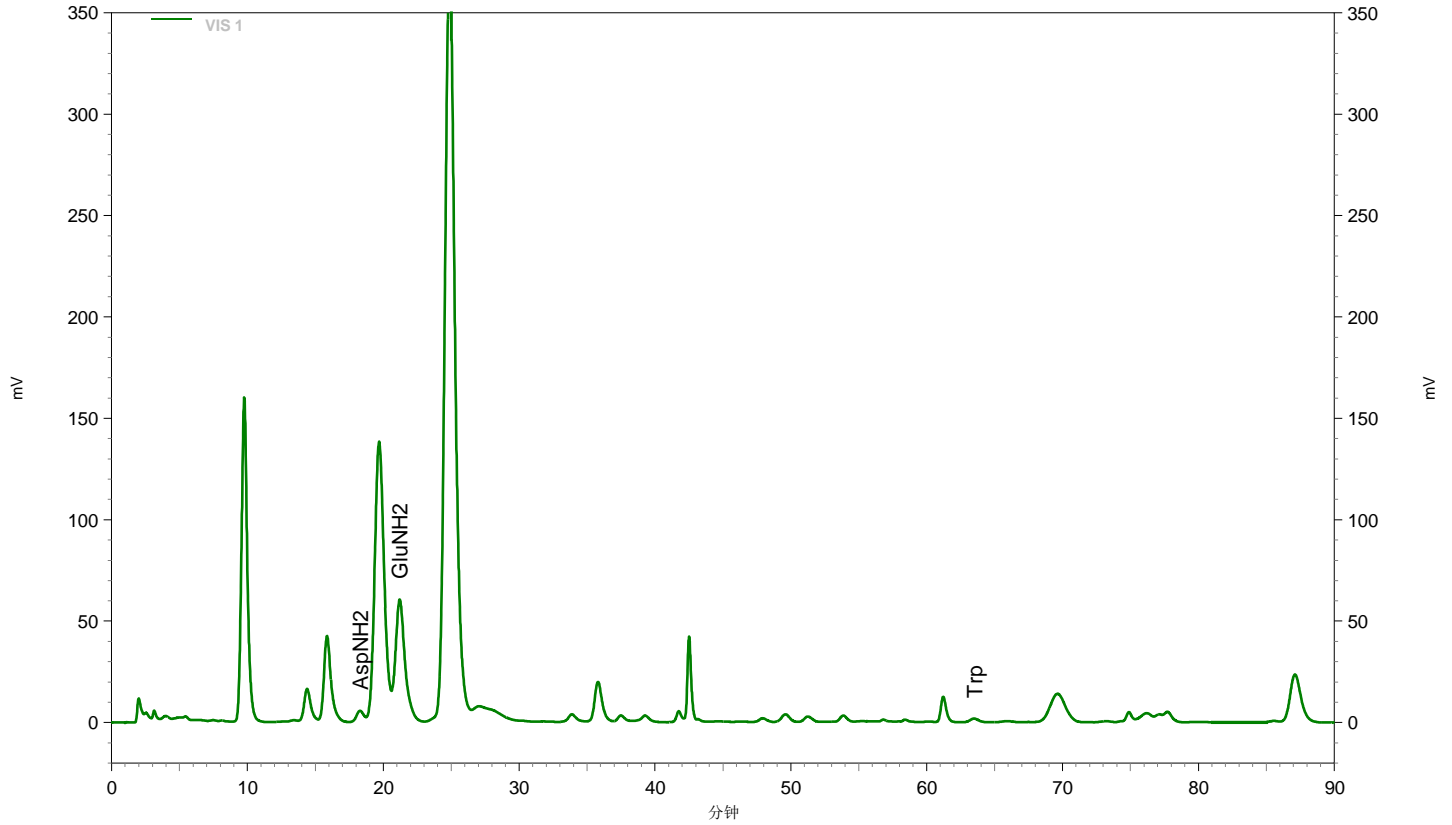

## VIS 1 result

| Peak # | Retention Time | Name   | Area     | Resolution | Mol concentration (nmol/mg) | CalcMol (ng/mg) |
|--------|----------------|--------|----------|------------|-----------------------------|-----------------|
| 16     | 18.287         | AspNH2 | 818343   | 2.42       | 1.14                        | 151.06          |
| 18     | 21.220         | GluNH2 | 11946527 | 1.17       | 14.60                       | 2133.00         |
| 40     | 63.493         | Trp    | 303881   | 2.40       | 0.48                        | 97.03           |

|     |  |  |          |  |       |  |
|-----|--|--|----------|--|-------|--|
| Sum |  |  | 13068751 |  | 16.22 |  |
|-----|--|--|----------|--|-------|--|

## VIS 2 result

| Peak # | Retention Time | Name | Area | Resolution | Mol concentration (nmol/mg) | CalcMol (ng/mg) |
|--------|----------------|------|------|------------|-----------------------------|-----------------|
|--------|----------------|------|------|------------|-----------------------------|-----------------|
