# Supplementary material for: Dynamic Variation of Amino Acid Contents and Identification of Sterols in Xinyang Mao Jian Green Tea
Source: MDPI journal article supplement (doi:10.3390/molecules27113562), 2022-06-01
Supplement: s1 [file s1]

# Hitachi Amino Acid Analyzer Report

Data File: E:\data\20210701 PF\PF-sm-chaye-yp202129670-sample-1-6-6ul-2021-7-3 11-34-53.dat  
Method: E:\data\20210701 PF\sm-chaye.met  
Sample ID: {Sample ID}  
Vial Number: 163 Inj. Volume(uL): 6

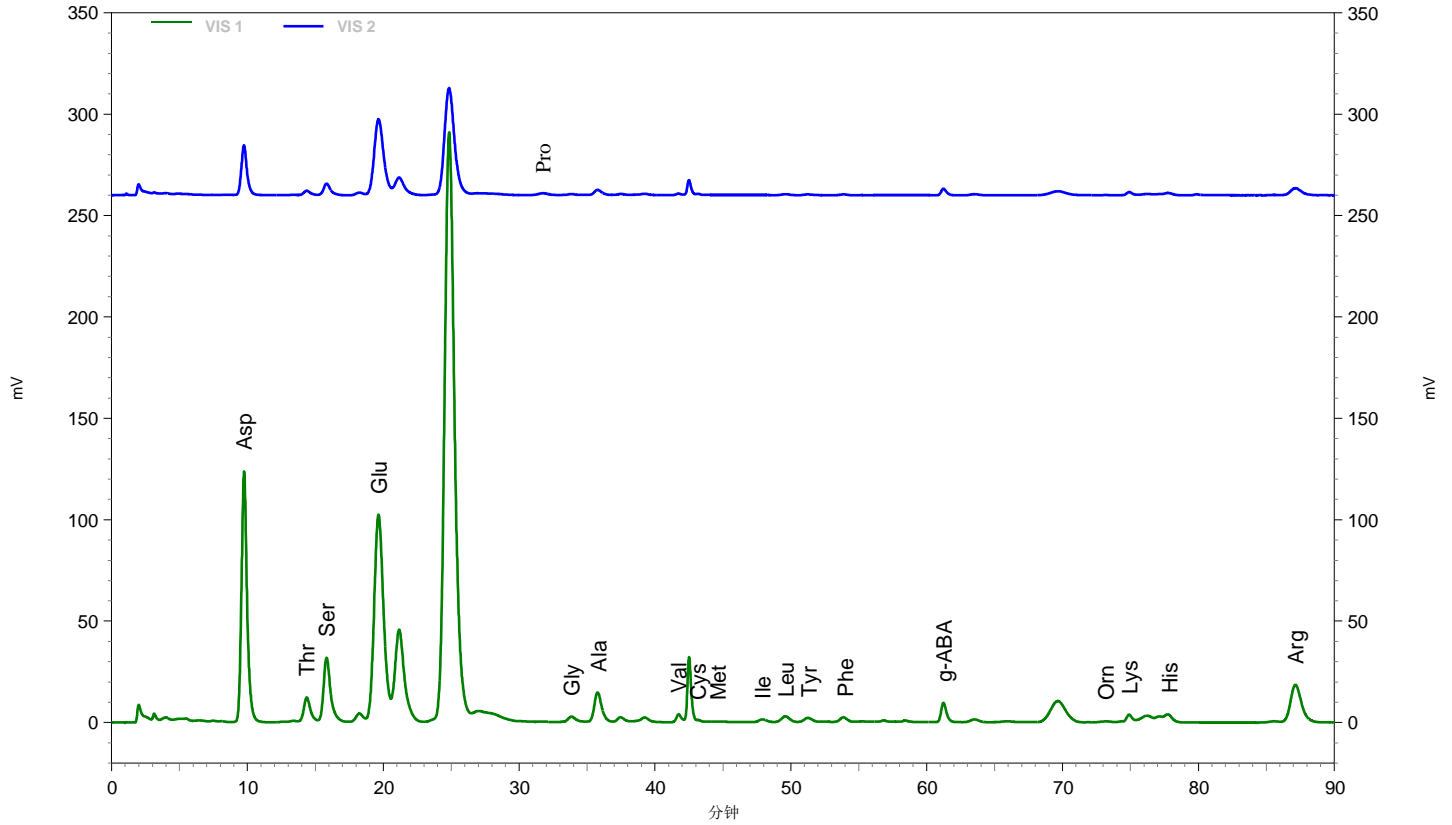

## VIS 1 result

| Peak # | Retention Time | Name  | Area     | Resolution | Mol concentration (nmol/mg) | CalcMol (ng/mg) |
|--------|----------------|-------|----------|------------|-----------------------------|-----------------|
| 10     | 9.753          | Asp   | 14144134 | 2.24       | 16.09                       | 2142.23         |
| 12     | 14.380         | Thr   | 1638000  | 1.11       | 1.78                        | 212.48          |
| 13     | 15.833         | Ser   | 4573329  | 1.63       | 4.96                        | 520.90          |
| 15     | 19.660         | Glu   | 19918036 | 1.20       | 22.10                       | 3250.80         |
| 19     | 33.860         | Gly   | 390642   | 2.71       | 0.41                        | 31.04           |
| 20     | 35.780         | Ala   | 2167361  | 1.92       | 2.26                        | 201.03          |
| 23     | 41.740         | Val   | 392261   | 2.76       | 0.39                        | 46.10           |
| 25     | 43.147         | Cys   | 70295    | 0.51       | 0.06                        | 14.84           |
| 26     | 44.567         | Met   | 17604    | 0.94       | 0.02                        | 2.56            |
| 27     | 47.940         | Ile   | 200009   | 3.33       | 0.19                        | 25.45           |
| 28     | 49.613         | Leu   | 461492   | 1.56       | 0.46                        | 59.85           |
| 29     | 51.267         | Tyr   | 317616   | 1.48       | 0.32                        | 57.38           |
| 30     | 53.887         | Phe   | 313544   | 2.55       | 0.32                        | 52.66           |
| 35     | 61.240         | g-ABA | 1043374  | 4.05       | 1.08                        | 111.73          |
| 39     | 73.213         | Orn   | 74473    | 2.12       | 0.05                        | 6.95            |
| 40     | 74.900         | Lys   | 489984   | 1.64       | 0.42                        | 62.06           |
| 43     | 77.747         | His   | 685259   | 0.29       | 0.63                        | 97.26           |
| 45     | 87.160         | Arg   | 4233875  | 1.04       | 4.22                        | 735.92          |

|     |  |  |          |  |       |  |
|-----|--|--|----------|--|-------|--|
| Sum |  |  | 51131288 |  | 55.77 |  |
|-----|--|--|----------|--|-------|--|

## VIS 2 result

| Peak # | Retention Time | Name | Area   | Resolution | Mol concentration (nmol/mg) | CalcMol (ng/mg) |
|--------|----------------|------|--------|------------|-----------------------------|-----------------|
| 8      | 31.747         | Pro  | 143038 | 5.40       | 0.52                        | 59.84           |

|     |  |  |        |  |      |  |
|-----|--|--|--------|--|------|--|
| Sum |  |  | 143038 |  | 0.52 |  |
|-----|--|--|--------|--|------|--|
