# Supplementary material for: Dynamic Variation of Amino Acid Contents and Identification of Sterols in Xinyang Mao Jian Green Tea
Source: MDPI journal article supplement (doi:10.3390/molecules27113562), 2022-06-01
Supplement: s1 [file s1]

# Hitachi Amino Acid Analyzer Report

Data File: E:\data\20210701 PF\PF-sm-chaye-yp202129670-sample-4-6ul-2021-7-2 13-07-43.dat  
Method: E:\data\20210701 PF\sm-asn.met  
Sample ID: {Sample ID}  
Vial Number: 154 Inj. Volume(uL): 6

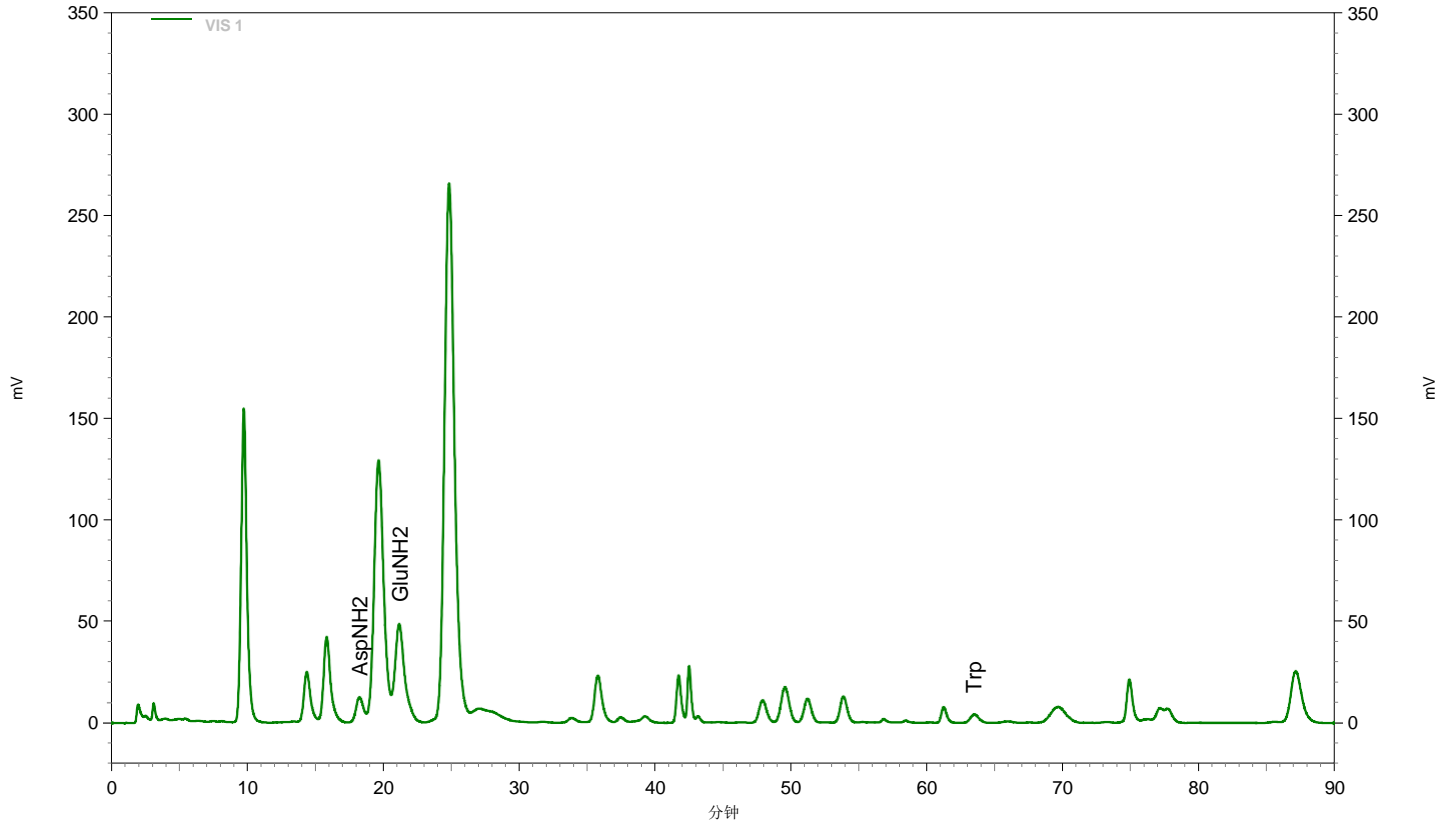

## VIS 1 result

| Peak # | Retention Time | Name   | Area     | Resolution | Mol concentration (nmol/mg) | CalcMol (ng/mg) |
|--------|----------------|--------|----------|------------|-----------------------------|-----------------|
| 16     | 18.273         | AspNH2 | 1910463  | 2.45       | 2.67                        | 353.18          |
| 18     | 21.193         | GluNH2 | 9858978  | 1.16       | 12.07                       | 1762.92         |
| 40     | 63.480         | Trp    | 720928   | 2.35       | 1.13                        | 230.54          |
| Sum    |                |        | 12490369 |            | 15.87                       |                 |

## VIS 2 result

| Peak # | Retention Time | Name | Area | Resolution | Mol concentration (nmol/mg) | CalcMol (ng/mg) |
|--------|----------------|------|------|------------|-----------------------------|-----------------|
|--------|----------------|------|------|------------|-----------------------------|-----------------|
