# Supplementary material for: Dynamic Variation of Amino Acid Contents and Identification of Sterols in Xinyang Mao Jian Green Tea
Source: MDPI journal article supplement (doi:10.3390/molecules27113562), 2022-06-01
Supplement: s1 [file s1]

# Hitachi Amino Acid Analyzer Report

Data File: E:\data\20210701 PF\PF-sm-chaye-yp202129670-sample-8-6ul-2021-7-3 2-13-38.dat  
 Method: E:\data\20210701 PF\sm-chaye.met  
 Sample ID: {Sample ID}  
 Vial Number: 158 Inj. Volume(uL): 6

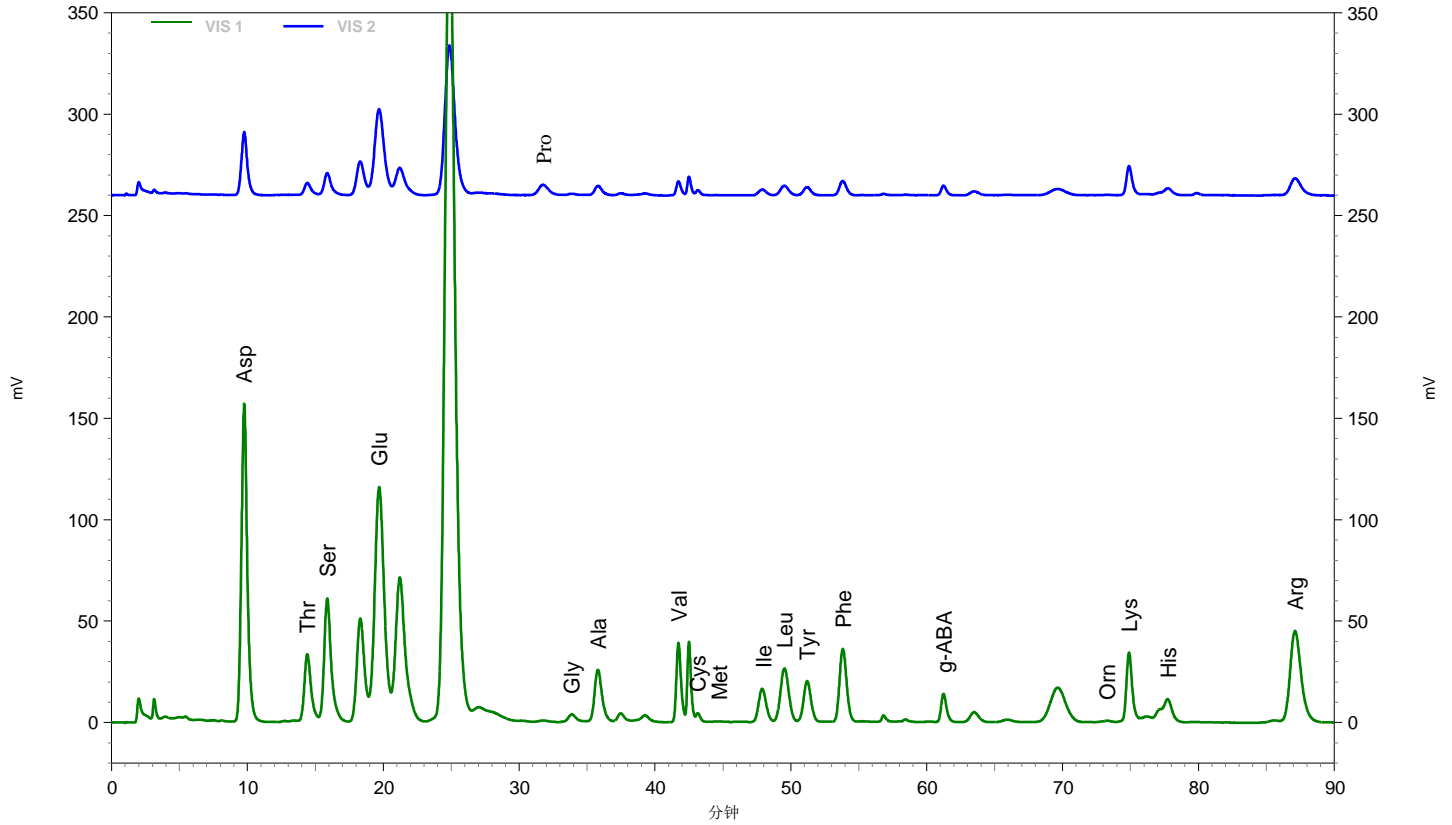

## VIS 1 result

| Peak # | Retention Time | Name  | Area     | Resolution | Mol concentration (nmol/mg) | CalcMol (ng/mg) |
|--------|----------------|-------|----------|------------|-----------------------------|-----------------|
| 10     | 9.767          | Asp   | 19124090 | 1.69       | 21.77                       | 2897.93         |
| 13     | 14.407         | Thr   | 4669993  | 0.84       | 5.09                        | 606.10          |
| 14     | 15.873         | Ser   | 9017937  | 1.61       | 9.78                        | 1027.64         |
| 16     | 19.693         | Glu   | 23000684 | 1.15       | 25.53                       | 3755.79         |
| 22     | 33.880         | Gly   | 628144   | 1.74       | 0.67                        | 49.94           |
| 23     | 35.807         | Ala   | 4023192  | 1.86       | 4.19                        | 373.34          |
| 26     | 41.740         | Val   | 3784026  | 2.66       | 3.80                        | 444.92          |
| 28     | 43.160         | Cys   | 371815   | 1.08       | 0.33                        | 78.53           |
| 29     | 44.680         | Met   | 30326    | 1.84       | 0.03                        | 4.41            |
| 30     | 47.900         | Ile   | 2546339  | 3.23       | 2.47                        | 324.18          |
| 31     | 49.533         | Leu   | 4497051  | 1.49       | 4.45                        | 583.55          |
| 32     | 51.207         | Tyr   | 3051402  | 1.54       | 3.04                        | 551.50          |
| 33     | 53.827         | Phe   | 5228543  | 2.62       | 5.32                        | 878.66          |
| 40     | 61.240         | g-ABA | 1538135  | 1.43       | 1.60                        | 164.79          |
| 45     | 73.293         | Orn   | 127540   | 1.46       | 0.09                        | 11.91           |
| 46     | 74.893         | Lys   | 4224079  | 1.56       | 3.66                        | 535.32          |
| 49     | 77.747         | His   | 2033791  | 0.00       | 1.86                        | 288.79          |
| 51     | 87.127         | Arg   | 10346995 | 0.92       | 10.33                       | 1799.38         |

|     |  |  |          |  |        |  |
|-----|--|--|----------|--|--------|--|
| Sum |  |  | 98244082 |  | 104.00 |  |
|-----|--|--|----------|--|--------|--|

## VIS 2 result

| Peak # | Retention Time | Name | Area    | Resolution | Mol concentration (nmol/mg) | CalcMol (ng/mg) |
|--------|----------------|------|---------|------------|-----------------------------|-----------------|
| 8      | 31.780         | Pro  | 1006681 | 5.14       | 3.66                        | 421.33          |

|     |  |  |         |  |      |  |
|-----|--|--|---------|--|------|--|
| Sum |  |  | 1006681 |  | 3.66 |  |
|-----|--|--|---------|--|------|--|
