# Supplementary material for: Dynamic Variation of Amino Acid Contents and Identification of Sterols in Xinyang Mao Jian Green Tea
Source: MDPI journal article supplement (doi:10.3390/molecules27113562), 2022-06-01
Supplement: s1 [file s1]

# Hitachi Amino Acid Analyzer Report

Data File: E:\data\20210701 PF\PF-sm-chaye-yp202129670-sample-5-6ul-2021-7-2 14-59-59.dat  
 Method: E:\data\20210701 PF\sm-chaye.met  
 Sample ID: {Sample ID}  
 Vial Number: 155 Inj. Volume(uL): 6

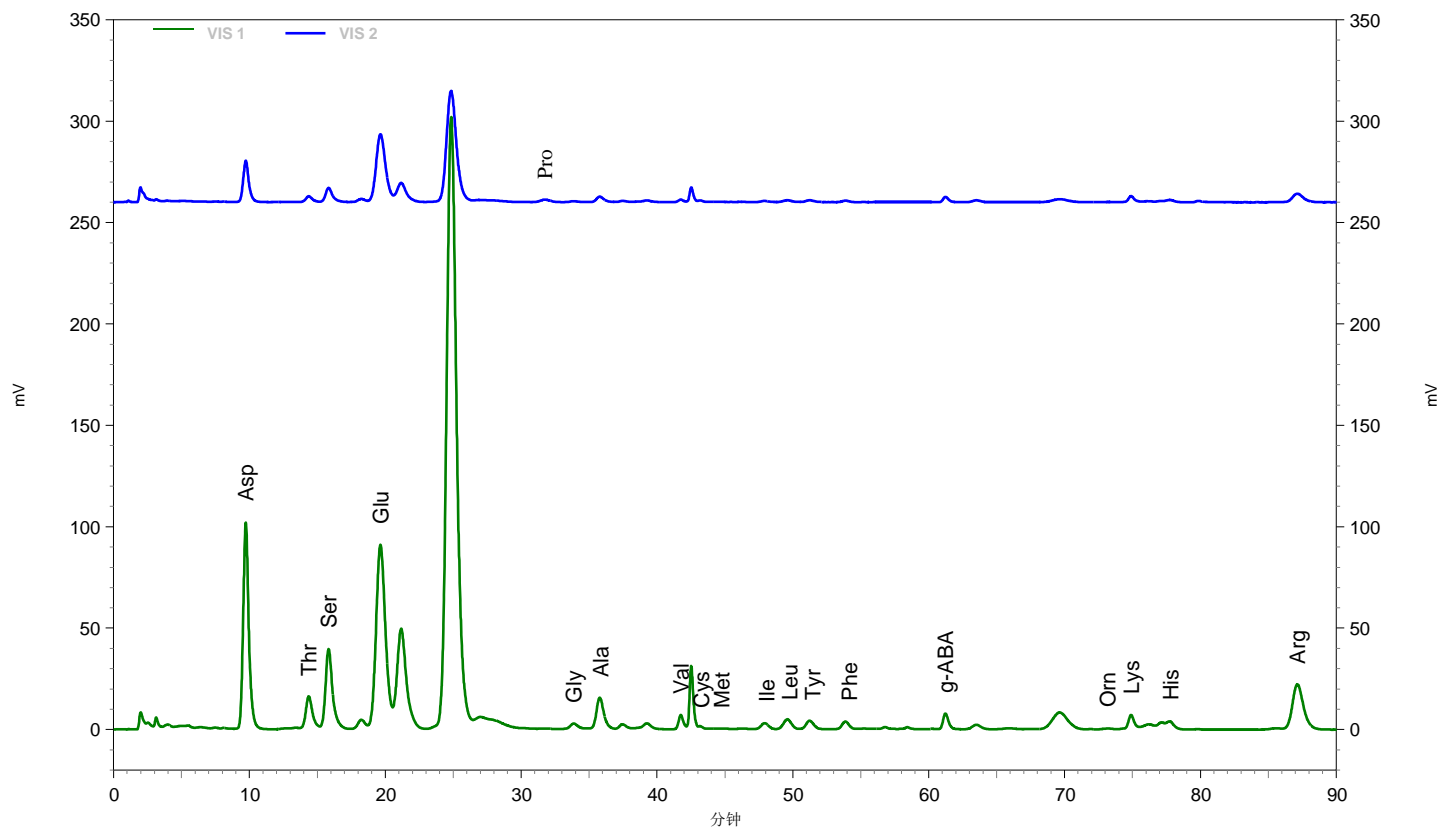

## VIS 1 result

| Peak # | Retention Time | Name  | Area     | Resolution | Mol concentration (nmol/mg) | CalcMol (ng/mg) |
|--------|----------------|-------|----------|------------|-----------------------------|-----------------|
| 11     | 9.733          | Asp   | 11827966 | 1.71       | 13.50                       | 1796.81         |
| 14     | 14.380         | Thr   | 2218530  | 0.89       | 2.42                        | 288.66          |
| 15     | 15.840         | Ser   | 5729836  | 1.62       | 6.23                        | 654.58          |
| 17     | 19.653         | Glu   | 17685942 | 1.19       | 19.68                       | 2895.17         |
| 22     | 33.873         | Gly   | 381375   | 0.00       | 0.40                        | 30.40           |
| 23     | 35.793         | Ala   | 2266203  | 1.94       | 2.37                        | 210.83          |
| 26     | 41.753         | Val   | 684728   | 2.80       | 0.69                        | 80.71           |
| 28     | 43.167         | Cys   | 109178   | 0.88       | 0.10                        | 23.12           |
| 29     | 44.680         | Met   | 13725    | 1.80       | 0.01                        | 2.00            |
| 30     | 47.940         | Ile   | 439443   | 3.75       | 0.43                        | 56.09           |
| 31     | 49.600         | Leu   | 797699   | 1.54       | 0.79                        | 103.77          |
| 32     | 51.247         | Tyr   | 644946   | 1.50       | 0.64                        | 116.86          |
| 33     | 53.880         | Phe   | 517940   | 2.60       | 0.53                        | 87.26           |
| 39     | 61.233         | g-ABA | 847308   | 0.00       | 0.88                        | 91.01           |
| 43     | 73.213         | Orn   | 71159    | 2.12       | 0.05                        | 6.66            |
| 44     | 74.900         | Lys   | 923266   | 1.67       | 0.80                        | 117.30          |
| 47     | 77.733         | His   | 662889   | 0.29       | 0.61                        | 94.36           |
| 49     | 87.140         | Arg   | 5079691  | 0.99       | 5.08                        | 885.59          |

|     |  |  |          |  |       |  |
|-----|--|--|----------|--|-------|--|
| Sum |  |  | 50901824 |  | 55.22 |  |
|-----|--|--|----------|--|-------|--|

## VIS 2 result

| Peak # | Retention Time | Name | Area   | Resolution | Mol concentration (nmol/mg) | CalcMol (ng/mg) |
|--------|----------------|------|--------|------------|-----------------------------|-----------------|
| 8      | 31.727         | Pro  | 211679 | 5.25       | 0.77                        | 88.82           |

|     |  |  |        |  |      |  |
|-----|--|--|--------|--|------|--|
| Sum |  |  | 211679 |  | 0.77 |  |
|-----|--|--|--------|--|------|--|
