# Supplementary material for: Dynamic Variation of Amino Acid Contents and Identification of Sterols in Xinyang Mao Jian Green Tea
Source: MDPI journal article supplement (doi:10.3390/molecules27113562), 2022-06-01
Supplement: s1 [file s1]

# eryHitachi Amino Acid Analyzer Report

Data File: E:\data\20210701 PF\PF-sm-chaye-yp202129670-sample-3-6ul-2021-7-2 11-15-26.dat  
 Method: E:\data\20210701 PF\sm-chaye.met  
 Sample ID: {Sample ID}  
 Vial Number: 153 Inj. Volume(uL): 6

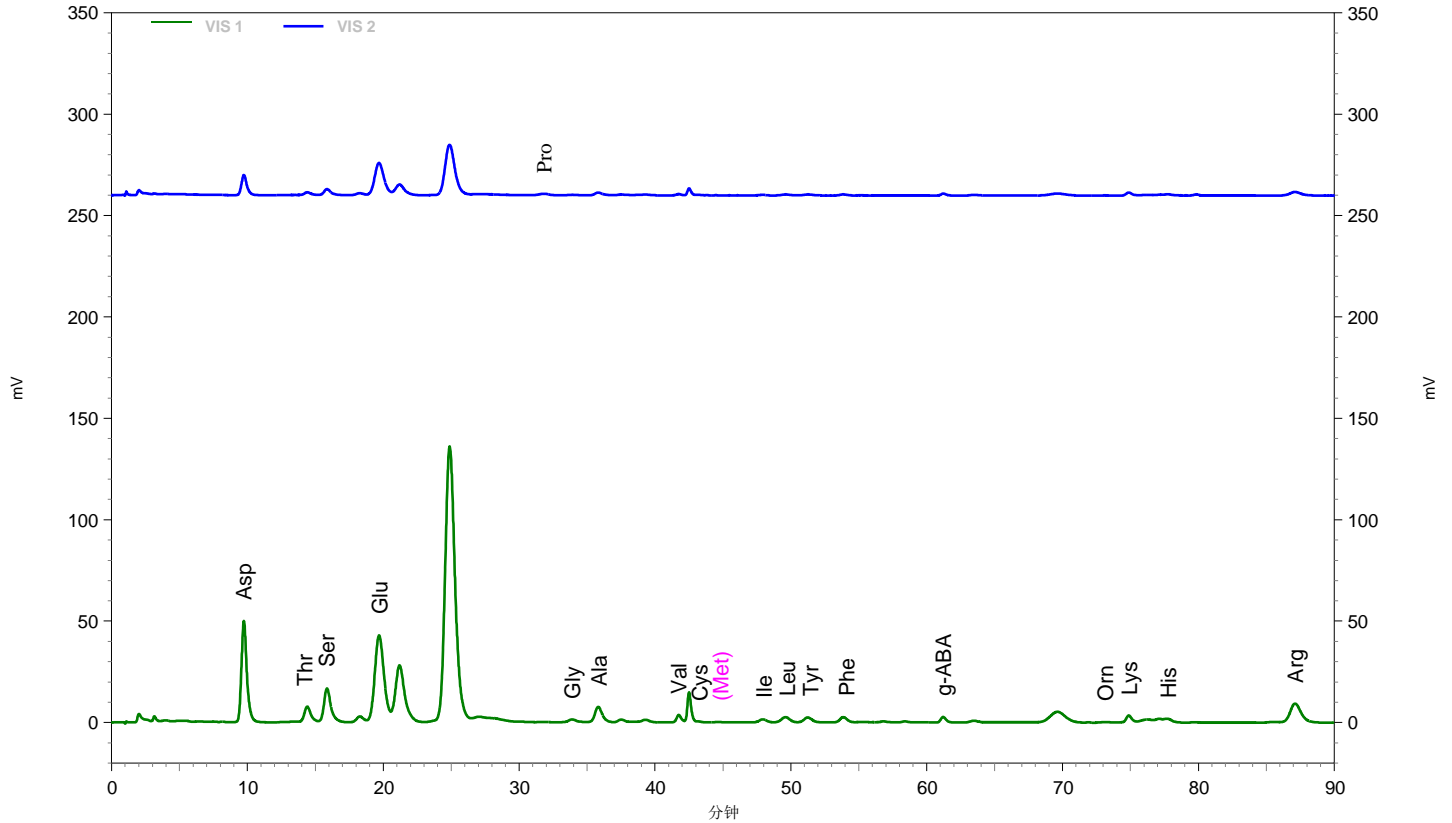

## VIS 1 result

| Peak # | Retention Time | Name  | Area    | Resolution | Mol concentration (nmol/mg) | CalcMol (ng/mg) |
|--------|----------------|-------|---------|------------|-----------------------------|-----------------|
| 10     | 9.740          | Asp   | 5553329 | 2.48       | 6.34                        | 843.20          |
| 12     | 14.400         | Thr   | 1022819 | 1.06       | 1.12                        | 133.01          |
| 13     | 15.860         | Ser   | 2371951 | 1.65       | 2.58                        | 270.84          |
| 15     | 19.693         | Glu   | 8246905 | 1.23       | 9.17                        | 1349.34         |
| 19     | 33.907         | Gly   | 197470  | 2.84       | 0.21                        | 15.73           |
| 20     | 35.827         | Ala   | 1103832 | 1.95       | 1.15                        | 102.64          |
| 23     | 41.747         | Val   | 355229  | 2.98       | 0.36                        | 41.85           |
| 25     | 43.140         | Cys   | 36104   | 0.74       | 0.03                        | 7.64            |
|        |                | Met   |         |            | 0.00 BDL                    | 0.00            |
| 26     | 47.940         | Ile   | 219649  | 4.30       | 0.21                        | 28.02           |
| 27     | 49.620         | Leu   | 427821  | 1.57       | 0.42                        | 55.63           |
| 28     | 51.253         | Tyr   | 374281  | 1.48       | 0.37                        | 67.78           |
| 29     | 53.873         | Phe   | 363686  | 2.56       | 0.37                        | 61.24           |
| 34     | 61.220         | g-ABA | 301350  | 4.08       | 0.31                        | 32.35           |
| 38     | 73.187         | Orn   | 41189   | 2.16       | 0.03                        | 3.85            |
| 39     | 74.880         | Lys   | 428956  | 1.71       | 0.37                        | 54.47           |
| 42     | 77.687         | His   | 308287  | 0.29       | 0.28                        | 43.86           |
| 43     | 87.120         | Arg   | 2051377 | 5.92       | 2.05                        | 357.46          |

|     |  |  |          |  |       |  |
|-----|--|--|----------|--|-------|--|
| Sum |  |  | 23404235 |  | 25.39 |  |
|-----|--|--|----------|--|-------|--|

## VIS 2 result

| Peak # | Retention Time | Name | Area  | Resolution | Mol concentration (nmol/mg) | CalcMol (ng/mg) |
|--------|----------------|------|-------|------------|-----------------------------|-----------------|
| 8      | 31.833         | Pro  | 99599 | 5.71       | 0.36                        | 41.77           |

|     |  |  |       |  |      |  |
|-----|--|--|-------|--|------|--|
| Sum |  |  | 99599 |  | 0.36 |  |
|-----|--|--|-------|--|------|--|
